# Supplementary material for: Computational mechanism investigation of Bi(i)/Bi(iii) redox-catalyzed hydrodefluorination (HDF) of polyfluoroarenes
Source: Royal Society of Chemistry journal article supplement (doi:10.1039/d2nj01020h), 2022-01-01
Supplement: d2nj01020h1.pdf [file d2nj01020h1.pdf]

## Supporting Information

### **Computational Mechanism Investigation of Bi(I)/Bi(III) redox catalyzed hydrodefluorination(HDF) of polyfluoroarenes**

Feiyun Jia,\* Jiewei Luo and Bo Zhang\*

School of Basic Medical Sciences & Forensic medicine, North Sichuan Medical College,  
Nanchong, Sichuan 637100, P. R. China

E-mail: jiaFY@nsmc.edu.cn; zhBo@nsmc.edu.cn

## Table of Contents

|                                                                                                 |    |
|-------------------------------------------------------------------------------------------------|----|
| I. Complete Gaussian 09 Reference                                                               | S3 |
| II. Influence of dispersion correction and solvent on barrier in optimization                   | S4 |
| III. Reaction barrier profile for ligand metathesis of Et <sub>2</sub> SiFH with intermediate 4 | S5 |
| IV. Comparison of the three oxidative addition transition state structures in Table 1           | S6 |
| V. Frontier Molecular Orbital Analysis                                                          | S7 |
| VI. Cartesian Coordinates                                                                       | S8 |

## I. Complete Gaussian 09 Reference

Frisch, M. J.; Trucks, G. W.; Schlegel, H. B.; Scuseria, G. E.; Robb, M. A.; Cheeseman, J. R.; Scalmani, G.; Barone, V.; Mennucci, B.; Petersson, G. A.; Nakatsuji, H.; Caricato, M.; Li, X.; Hratchian, H. P.; Izmaylov, A. F.; Bloino, J.; Zheng, G.; Sonnenberg, J. L.; Hada, M.; Ehara, M.; Toyota, K.; Fukuda, R.; Hasegawa, J.; Ishida, M.; Nakajima, T.; Honda, Y.; Kitao, O.; Nakai, H.; Vreven, T.; Montgomery, J. A., Jr.; Peralta, J. E.; Ogliaro, F.; Bearpark, M.; Heyd, J. J.; Brothers, E.; Kudin, K. N.; Staroverov, V. N.; Kobayashi, R.; Normand, J.; Raghavachari, K.; Rendell, A.; Burant, J. C.; Iyengar, S. S.; Tomasi, J.; Cossi, M.; Rega, N.; Millam, J. M.; Klene, M.; Knox, J. E.; Cross, J. B.; Bakken, V.; Adamo, C.; Jaramillo, J.; Gomperts, R.; Stratmann, R. E.; Yazyev, O.; Austin, A. J.; Cammi, R.; Pomelli, C.; Ochterski, J. W.; Martin, R. L.; Morokuma, K.; Zakrzewski, V. G.; Voth, G. A.; Salvador, P.; Dannenberg, J. J.; Dapprich, S.; Daniels, A. D.; Farkas, Ö.; Foresman, J. B.; Ortiz, J. V.; Cioslowski, J.; Fox, D. J. Gaussian 09, revision D.01; Gaussian, Inc.: Wallingford, CT, 2010.

## II. Influence of dispersion correction and solvent on barrier in optimization

**Table S1.** Comparison of relative free energy barriers for selected key transition state optimized in gas phases without dispersion correction and in solvent phases with dispersion correction. The optimizations were performed using B3LYP-D3 (BJ) (SMD)/def2-SVP method and single point energy corrections were added using B3LYP-D3 (BJ) (SMD)/def2-TZVP method.

| Selected species                       | Optimized in gas phase without dispersion correction ( <i>kcal/mol</i> ) | Optimized in solvent phase with dispersion correction ( <i>kcal/mol</i> ) |
|----------------------------------------|--------------------------------------------------------------------------|---------------------------------------------------------------------------|
| <b>3a+1a</b>                           | 0.00                                                                     | 0.00                                                                      |
| <b>ts1</b>                             | <b>11.00</b>                                                             | <b>9.93</b>                                                               |
| <b>4+Et<sub>2</sub>SiH<sub>2</sub></b> | 0.00                                                                     | 0.00                                                                      |
| <b>ts2</b>                             | <b>16.07</b>                                                             | <b>17.42</b>                                                              |

III. Reaction barrier profile for ligand metathesis of **Et<sub>2</sub>SiFH** with intermediate **4**.

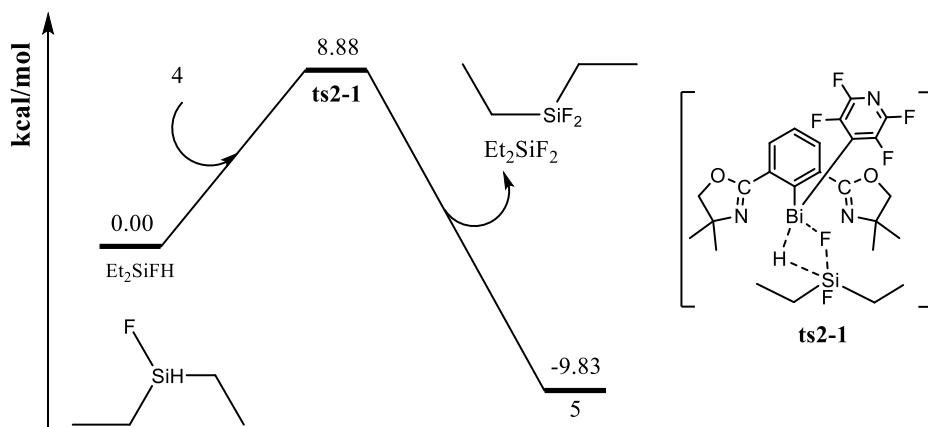

**Figure S1.** Reaction barrier profile for ligand metathesis of **Et<sub>2</sub>SiFH** with intermediate **4**.

IV. Comparison of the three oxidative addition transition state structures in Table 1.

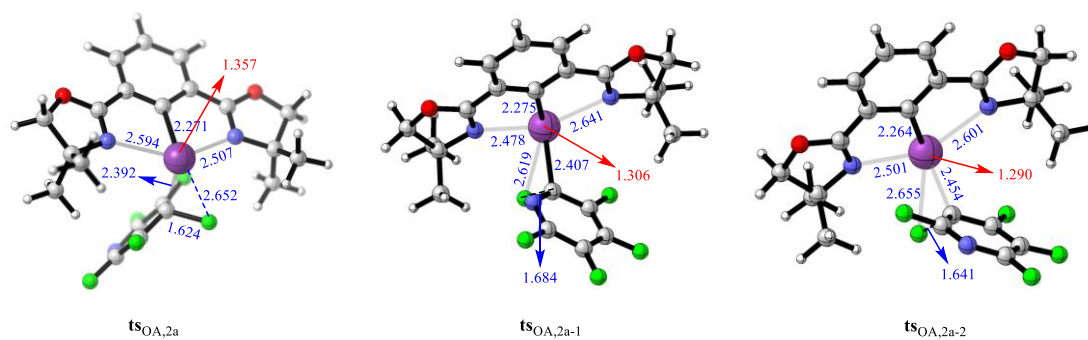

**Figure S2.** Calculated structures of transition states with selected bond distances in Angstroms and NPA charge values in a.u..

## V. Frontier Molecular Orbital Analysis of Three Catalysts for Oxidative Addition to Hexafluorobenzene

**Table S2.** Frontier molecular orbital analysis of three catalysts for oxidative addition to hexafluorobenzene.

|                                               | cat. <b>3a</b> (ev) | cat. <b>3b</b> (ev) | cat. <b>3c</b> (ev) | <b>1b</b> (ev) |
|-----------------------------------------------|---------------------|---------------------|---------------------|----------------|
| LUMO                                          | -1.63               | -1.75               | -1.69               | -0.88          |
| HOMO                                          | -4.20               | -4.35               | -4.18               | 7.36           |
| Gap(1b <sub>LUMO</sub> -cat <sub>HOMO</sub> ) | 3.32                | 3.47                | 3.30                |                |

## VI. Cartesian Coordinates\*

\*Among the 6 energy data for each of the following species, the first three energies are calculated with the def2-SVP basis set and then energies 4-6 are calculated with the def2-TZVP basis set.

**The following are the details of the calculation data for each species in Figure 1:**

1a

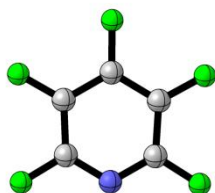

B3LYP electronic energy: -743.8821136 a.u.  
B3LYP enthalpy: -743.823911 a.u.  
B3LYP free energy: -743.867018 a.u.  
B3LYP SCF energy in solution: -744.788476857 a.u.  
B3LYP enthalpy in solution: -744.730273857 a.u.  
B3LYP free energy in solution: -744.773380857 a.u.

Cartesian coordinates

| ATOM | X           | Y           | Z           |
|------|-------------|-------------|-------------|
| C    | -1.13478300 | -0.97284300 | 0.00025900  |
| C    | -1.20769800 | 0.42352600  | 0.00034100  |
| C    | 0.00000000  | 1.12942900  | 0.00060400  |
| C    | 1.20769900  | 0.42354200  | 0.00038200  |
| C    | 1.13478200  | -0.97283500 | 0.00044200  |
| N    | 0.00000700  | -1.63123800 | 0.00024400  |
| F    | -2.26162300 | -1.66851400 | -0.00037900 |
| F    | -2.36695300 | 1.06762200  | -0.00019300 |
| F    | -0.00002300 | 2.44995100  | -0.00032200 |
| F    | 2.36695800  | 1.06762300  | -0.00022300 |
| F    | 2.26163700  | -1.66848800 | -0.00042400 |

2a

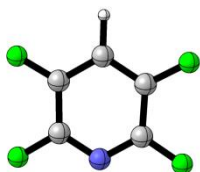



B3LYP electronic energy: -644.7375262 a.u.  
 B3LYP enthalpy: -644.672357 a.u.  
 B3LYP free energy: -644.713236 a.u.  
 B3LYP SCF energy in solution: -645.522838195 a.u.  
 B3LYP enthalpy in solution: -645.457669195 a.u.  
 B3LYP free energy in solution: -645.498548195 a.u.

Cartesian coordinates

| ATOM | X           | Y           | Z           |
|------|-------------|-------------|-------------|
| C    | -1.13528500 | -0.70257700 | 0.00005600  |
| C    | -1.19493800 | 0.69677600  | -0.00005000 |
| C    | 0.00000900  | 1.41081200  | -0.00010900 |
| C    | 1.19494200  | 0.69679000  | -0.00006700 |
| C    | 1.13525700  | -0.70258400 | -0.00002800 |
| N    | -0.00000300 | -1.35974800 | 0.00004200  |
| F    | -2.26310600 | -1.39983700 | -0.00002500 |
| F    | -2.36829800 | 1.32323000  | 0.00005800  |
| F    | 2.36832300  | 1.32318800  | 0.00007200  |
| F    | 2.26309700  | -1.39982200 | -0.00000600 |
| H    | -0.00003900 | 2.50209000  | 0.00000300  |

3a

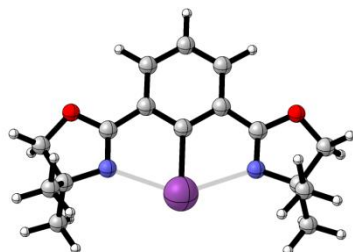

B3LYP electronic energy: -1095.1834881 a.u.  
 B3LYP enthalpy: -1094.837731 a.u.  
 B3LYP free energy: -1094.908824 a.u.  
 B3LYP SCF energy in solution: -1096.26943535 a.u.  
 B3LYP enthalpy in solution: -1095.92367835 a.u.  
 B3LYP free energy in solution: -1095.99477135 a.u.

Cartesian coordinates

| ATOM | X           | Y          | Z           |
|------|-------------|------------|-------------|
| C    | -1.21909800 | 1.88942400 | -0.01236300 |
| C    | -0.00012000 | 1.16108000 | -0.01494400 |
| C    | 1.21876300  | 1.88961700 | -0.01251100 |
| C    | 1.21347300  | 3.29214700 | -0.00723700 |
| C    | -0.00031500 | 3.99054400 | -0.00389000 |

|    |             |             |             |
|----|-------------|-------------|-------------|
| C  | -1.21402100 | 3.29192100  | -0.00706600 |
| H  | 2.16309900  | 3.83301000  | -0.00577200 |
| H  | -0.00042000 | 5.08267600  | 0.00025600  |
| H  | -2.16372500 | 3.83264200  | -0.00546000 |
| C  | 2.42353200  | 1.08707200  | -0.01624400 |
| C  | 3.77797000  | -0.71591100 | 0.04220100  |
| C  | 4.60139900  | 0.59680800  | -0.14778700 |
| H  | 5.39821600  | 0.72748200  | 0.59908300  |
| H  | 5.04194700  | 0.67026100  | -1.15657700 |
| C  | -2.42385200 | 1.08675900  | -0.01597900 |
| C  | -3.77834800 | -0.71613400 | 0.04211100  |
| C  | -4.60187900 | 0.59672400  | -0.14678100 |
| H  | -5.04347600 | 0.67047500  | -1.15508300 |
| H  | -5.39793400 | 0.72725900  | 0.60093700  |
| N  | 2.39324700  | -0.20991900 | -0.03240600 |
| N  | -2.39361800 | -0.21017500 | -0.03224600 |
| O  | 3.64806100  | 1.66069600  | 0.00941300  |
| O  | -3.64832100 | 1.66051700  | 0.00972200  |
| C  | -4.05064500 | -1.72981300 | -1.07417400 |
| H  | -3.42522600 | -2.62623500 | -0.94386100 |
| H  | -5.10632600 | -2.04743100 | -1.06425500 |
| H  | -3.82383900 | -1.29718100 | -2.06025900 |
| C  | -4.02199800 | -1.34507300 | 1.42367500  |
| H  | -5.05810900 | -1.71246300 | 1.50727000  |
| H  | -3.33907100 | -2.19225800 | 1.58693500  |
| H  | -3.84649400 | -0.61013700 | 2.22443200  |
| C  | 4.05021100  | -1.73048400 | -1.07326300 |
| H  | 5.10591900  | -2.04800000 | -1.06320200 |
| H  | 3.42490900  | -2.62687000 | -0.94212800 |
| H  | 3.82324200  | -1.29869900 | -2.05968100 |
| C  | 4.02173300  | -1.34368000 | 1.42428700  |
| H  | 3.33868400  | -2.19059800 | 1.58841300  |
| H  | 5.05779700  | -1.71116300 | 1.50803600  |
| H  | 3.84648400  | -0.60800600 | 2.22442400  |
| Bi | 0.00033900  | -1.03626300 | -0.04197900 |

4-1

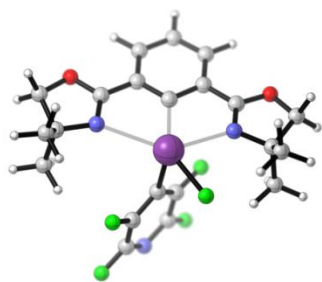

B3LYP electronic energy: -1839.0942677 a.u.  
 B3LYP enthalpy: -1838.689126 a.u.  
 B3LYP free energy: -1838.783677 a.u.  
 B3LYP SCF energy in solution: -1841.11212025 a.u.  
 B3LYP enthalpy in solution: -1840.70697925 a.u.  
 B3LYP free energy in solution: -1840.80152925 a.u.

Cartesian coordinates

| ATOM | X           | Y           | Z           |
|------|-------------|-------------|-------------|
| C    | -0.65975000 | -2.47035500 | 1.06536100  |
| C    | 0.41221300  | -1.70292700 | 0.58645200  |
| C    | 1.69595300  | -1.99396400 | 1.06689400  |
| C    | 1.91896800  | -2.98881600 | 2.03227000  |
| C    | 0.83257500  | -3.72255900 | 2.51675300  |
| C    | -0.45390300 | -3.47402100 | 2.03153100  |
| H    | 2.93169300  | -3.18450100 | 2.39188700  |
| H    | 0.98999300  | -4.49794800 | 3.26990900  |
| H    | -1.30469400 | -4.05422600 | 2.39494600  |
| C    | 2.77710500  | -1.19724100 | 0.47843400  |
| C    | 3.83731800  | 0.37308000  | -0.74971400 |
| C    | 4.85266400  | -0.49278600 | 0.05700700  |
| H    | 5.44614900  | -1.16387500 | -0.58499700 |
| H    | 5.52861700  | 0.09610400  | 0.69191300  |
| C    | -1.99595300 | -2.20610500 | 0.50964400  |
| C    | -3.71493400 | -1.33179700 | -0.63346700 |
| C    | -4.16034600 | -2.62127900 | 0.12447500  |
| H    | -5.01714500 | -2.46337200 | 0.79515400  |
| H    | -4.38674800 | -3.45986500 | -0.55477300 |
| N    | 2.57396600  | -0.35230100 | -0.46961600 |
| N    | -2.26083000 | -1.29380500 | -0.35480600 |
| O    | 4.03226900  | -1.32131100 | 0.91980100  |
| O    | -3.01776400 | -2.98552300 | 0.92185900  |
| C    | -4.38378500 | -0.07748300 | -0.04991400 |
| H    | -3.97249000 | 0.82899600  | -0.51352100 |
| H    | -5.47051600 | -0.10092500 | -0.23235300 |
| H    | -4.21832300 | -0.01574600 | 1.03711400  |
| C    | -3.96351500 | -1.42828500 | -2.14214900 |

|    |             |             |             |
|----|-------------|-------------|-------------|
| H  | -5.04102200 | -1.51827800 | -2.35572000 |
| H  | -3.59026900 | -0.52564300 | -2.64922700 |
| H  | -3.45052000 | -2.30289500 | -2.57131300 |
| C  | 3.72535600  | 1.80184800  | -0.19610200 |
| H  | 4.66211900  | 2.35487200  | -0.37432300 |
| H  | 2.89414500  | 2.30366700  | -0.71053200 |
| H  | 3.52480200  | 1.78827400  | 0.88662300  |
| C  | 4.12634400  | 0.39140600  | -2.25227500 |
| H  | 3.31599300  | 0.94239300  | -2.74998100 |
| H  | 5.08696800  | 0.89122900  | -2.45677800 |
| H  | 4.17404100  | -0.63167100 | -2.65910600 |
| Bi | 0.18609000  | -0.09222800 | -1.18031300 |
| C  | -0.35851900 | 2.88102900  | 2.34112000  |
| C  | 0.11065700  | 1.80734000  | 1.57307600  |
| C  | -0.49243700 | 1.51840300  | 0.35485800  |
| C  | -1.52727900 | 2.36266700  | -0.02658200 |
| C  | -1.93420100 | 3.40407000  | 0.81018100  |
| N  | -1.35450700 | 3.64681200  | 1.96278300  |
| F  | 0.22021600  | 3.14748300  | 3.50935200  |
| F  | 1.13934300  | 1.08442200  | 2.04210500  |
| F  | 1.28065900  | 1.60942000  | -1.99313800 |
| F  | -2.16535300 | 2.17518100  | -1.19875300 |
| F  | -2.94618900 | 4.18624000  | 0.44288800  |

4

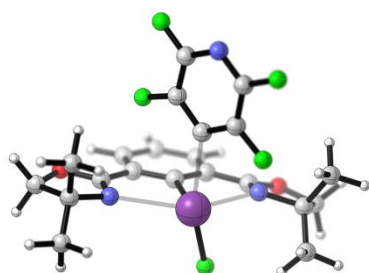

B3LYP electronic energy: -1839.0880405 a.u.  
 B3LYP enthalpy: -1838.683194 a.u.  
 B3LYP free energy: -1838.779029 a.u.  
 B3LYP SCF energy in solution: -1841.1138232 a.u.  
 B3LYP enthalpy in solution: -1840.7089762 a.u.  
 B3LYP free energy in solution: -1840.8048122 a.u.

Cartesian coordinates

| ATOM | X           | Y           | Z          |
|------|-------------|-------------|------------|
| C    | -0.77801900 | -1.87990400 | 1.69428900 |
| C    | 0.30278400  | -1.43851300 | 0.92725600 |

|    |             |             |             |
|----|-------------|-------------|-------------|
| C  | 1.60579800  | -1.70590300 | 1.34960900  |
| C  | 1.83497700  | -2.39523100 | 2.55170600  |
| C  | 0.74647100  | -2.82585300 | 3.31762100  |
| C  | -0.56299300 | -2.58011500 | 2.89271200  |
| H  | 2.85795800  | -2.59570100 | 2.87696400  |
| H  | 0.92093000  | -3.36453900 | 4.25157400  |
| H  | -1.41463200 | -2.92795700 | 3.48139400  |
| C  | 2.68112500  | -1.23038600 | 0.47079600  |
| C  | 3.77221200  | -0.22360200 | -1.21692800 |
| C  | 4.77553800  | -0.90169300 | -0.23184600 |
| H  | 5.28471200  | -1.77294200 | -0.67462400 |
| H  | 5.52812200  | -0.21212700 | 0.17572500  |
| C  | -2.10566000 | -1.60284500 | 1.13358800  |
| C  | -3.72369400 | -0.86252800 | -0.25712800 |
| C  | -4.28987500 | -1.90151400 | 0.76603400  |
| H  | -5.10499000 | -1.50013100 | 1.38512700  |
| H  | -4.62138600 | -2.83686400 | 0.28999800  |
| N  | 2.47149100  | -0.66423700 | -0.66603700 |
| N  | -2.29475800 | -0.81789400 | 0.13052200  |
| O  | 3.95522400  | -1.37211300 | 0.85912000  |
| O  | -3.17858000 | -2.22025400 | 1.63524000  |
| C  | -4.36415100 | 0.51917400  | -0.07364900 |
| H  | -3.84910200 | 1.26797400  | -0.69044900 |
| H  | -5.42605100 | 0.49023000  | -0.36723900 |
| H  | -4.30413500 | 0.84424500  | 0.97703700  |
| C  | -3.84094300 | -1.35690600 | -1.70568900 |
| H  | -4.88772300 | -1.60569400 | -1.94465100 |
| H  | -3.51705800 | -0.56886700 | -2.40388200 |
| H  | -3.19178900 | -2.22993200 | -1.86696300 |
| C  | 3.85288100  | 1.30886100  | -1.14031100 |
| H  | 4.83047100  | 1.66454700  | -1.50410100 |
| H  | 3.06785000  | 1.76788000  | -1.76021600 |
| H  | 3.71124500  | 1.65335700  | -0.10517600 |
| C  | 3.94938400  | -0.72004400 | -2.65472900 |
| H  | 3.19376100  | -0.26877300 | -3.31588900 |
| H  | 4.94419600  | -0.44461700 | -3.04069600 |
| H  | 3.84350800  | -1.81413800 | -2.71113500 |
| Bi | -0.13723400 | -0.45487700 | -1.08064900 |
| C  | 0.61415200  | 3.56447300  | 1.62254300  |
| C  | 0.72297400  | 2.25445100  | 1.14076200  |
| C  | -0.11996400 | 1.78923100  | 0.14177500  |
| C  | -1.02822000 | 2.72884600  | -0.32186600 |
| C  | -1.08561100 | 4.01882400  | 0.21262200  |
| N  | -0.27482900 | 4.41736000  | 1.16636000  |

|   |             |             |             |
|---|-------------|-------------|-------------|
| F | 1.43866500  | 3.98772300  | 2.58304000  |
| F | 1.68816900  | 1.46791100  | 1.67310800  |
| F | -0.78352900 | -2.42098800 | -1.73465200 |
| F | -1.89095700 | 2.40909700  | -1.32409700 |
| F | -1.98090100 | 4.89495400  | -0.24681300 |

5-1

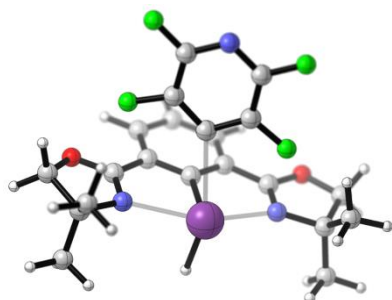

|                                |                     |
|--------------------------------|---------------------|
| B3LYP electronic energy:       | -1739.8639467 a.u.  |
| B3LYP enthalpy:                | -1739.456734 a.u.   |
| B3LYP free energy:             | -1739.551393 a.u.   |
| B3LYP SCF energy in solution:  | -1741.75401673 a.u. |
| B3LYP enthalpy in solution:    | -1741.34680473 a.u. |
| B3LYP free energy in solution: | -1741.44146273 a.u. |

Cartesian coordinates

| ATOM | X           | Y           | Z           |
|------|-------------|-------------|-------------|
| C    | -1.42941400 | -0.88804900 | 1.97149000  |
| C    | -0.28304200 | -1.07261300 | 1.19586700  |
| C    | 0.93868600  | -1.36062400 | 1.80988900  |
| C    | 1.02303600  | -1.45298700 | 3.20881500  |
| C    | -0.12803600 | -1.26172500 | 3.98044800  |
| C    | -1.35592400 | -0.98034700 | 3.37178300  |
| H    | 1.98279300  | -1.66927400 | 3.68286600  |
| H    | -0.06718200 | -1.32989800 | 5.06875300  |
| H    | -2.25424700 | -0.83011400 | 3.97436000  |
| C    | 2.07509600  | -1.54788300 | 0.90404700  |
| C    | 3.28118300  | -1.78649300 | -0.98899000 |
| C    | 4.20270300  | -1.74500900 | 0.26894800  |
| H    | 4.88142400  | -2.60552900 | 0.34709500  |
| H    | 4.77617800  | -0.80886200 | 0.33882700  |
| C    | -2.66434400 | -0.59955400 | 1.23297000  |
| C    | -4.12276600 | -0.28585500 | -0.45419800 |
| C    | -4.79942300 | -0.01528400 | 0.92787900  |
| H    | -5.05013600 | 1.04661900  | 1.07683800  |
| H    | -5.69465000 | -0.62774300 | 1.10668400  |

|    |             |             |             |
|----|-------------|-------------|-------------|
| N  | 1.95938000  | -1.50833800 | -0.38037900 |
| N  | -2.72333600 | -0.55339600 | -0.05241700 |
| O  | 3.29291800  | -1.78364000 | 1.39334900  |
| O  | -3.80042500 | -0.37708700 | 1.90708700  |
| C  | -4.20242200 | 0.93459400  | -1.37677400 |
| H  | -3.70288500 | 0.73022300  | -2.33599200 |
| H  | -5.25465700 | 1.18405800  | -1.58969600 |
| H  | -3.71032700 | 1.80617200  | -0.92362100 |
| C  | -4.69800500 | -1.53709300 | -1.13459000 |
| H  | -5.74825100 | -1.37130400 | -1.42445500 |
| H  | -4.12548100 | -1.78111600 | -2.04222000 |
| H  | -4.65490700 | -2.40797400 | -0.46210300 |
| C  | 3.65961300  | -0.70912600 | -2.00905600 |
| H  | 4.67683800  | -0.88878300 | -2.39316600 |
| H  | 2.97108900  | -0.72660700 | -2.86835800 |
| H  | 3.62281700  | 0.28621000  | -1.54743100 |
| C  | 3.25306100  | -3.18122400 | -1.63356300 |
| H  | 2.49543900  | -3.22436700 | -2.43055400 |
| H  | 4.23341500  | -3.42088500 | -2.07610500 |
| H  | 3.00624500  | -3.95587700 | -0.89104000 |
| Bi | -0.32664500 | -0.83404000 | -1.05325300 |
| C  | 2.18543100  | 3.50375200  | 0.55204400  |
| C  | 1.96138600  | 2.15142800  | 0.27502600  |
| C  | 0.77486200  | 1.69636800  | -0.27205500 |
| C  | -0.13743900 | 2.71174000  | -0.49880400 |
| C  | 0.13634600  | 4.04897700  | -0.19924600 |
| N  | 1.28317100  | 4.43120100  | 0.31794700  |
| F  | 3.35107900  | 3.90100800  | 1.07824500  |
| F  | 2.98680700  | 1.28649400  | 0.56469900  |
| F  | -1.36572900 | 2.42748300  | -1.03737000 |
| F  | -0.77931100 | 4.99753300  | -0.43430900 |
| H  | -0.60558300 | -2.73071400 | -1.12320600 |

5

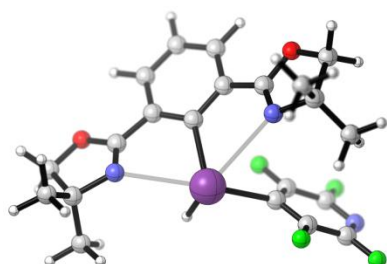

B3LYP electronic energy: -1739.8873245 a.u.

B3LYP enthalpy: -1739.479029 a.u.

B3LYP free energy: -1739.573608 a.u.  
B3LYP SCF energy in solution: -1741.76863037 a.u.  
B3LYP enthalpy in solution: -1741.36033437 a.u.  
B3LYP free energy in solution: -1741.45491437 a.u.

Cartesian coordinates

| ATOM | X           | Y           | Z           |
|------|-------------|-------------|-------------|
| C    | 0.12259000  | 2.30001600  | 0.55979200  |
| C    | 1.03504900  | 1.23882500  | 0.39499700  |
| C    | 2.33473800  | 1.39809600  | 0.91796200  |
| C    | 2.66088800  | 2.50992800  | 1.71667700  |
| C    | 1.71036600  | 3.49823200  | 1.96093200  |
| C    | 0.45681800  | 3.41048700  | 1.35823000  |
| H    | 3.66981500  | 2.59203200  | 2.12408800  |
| H    | 1.95805600  | 4.35657500  | 2.58949400  |
| H    | -0.27580400 | 4.20865200  | 1.48391800  |
| C    | 3.40587700  | 0.45676500  | 0.54606200  |
| C    | 4.62308800  | -1.12456900 | -0.46537700 |
| C    | -1.14786700 | 2.33905700  | -0.19311800 |
| N    | 3.34492200  | -0.38808400 | -0.41263500 |
| N    | -1.50656100 | 1.52035000  | -1.10594000 |
| C    | -2.47805600 | 2.42592300  | -3.16145400 |
| H    | -2.13780500 | 1.55588900  | -3.74291400 |
| H    | -3.38738100 | 2.82762600  | -3.63786800 |
| H    | -1.69230800 | 3.19615900  | -3.20746500 |
| C    | -3.85823900 | 0.95010800  | -1.65059300 |
| H    | -4.78666600 | 1.32509600  | -2.11131100 |
| H    | -3.54633300 | 0.04268300  | -2.18734900 |
| H    | -4.08037700 | 0.67075300  | -0.60998500 |
| C    | 4.38890600  | -2.59862700 | -0.10201100 |
| H    | 5.33958500  | -3.15633600 | -0.11909300 |
| H    | 3.94638300  | -2.69160100 | 0.90140900  |
| H    | 3.70121600  | -3.06965700 | -0.82043800 |
| C    | 5.47930300  | -0.38902500 | 0.61648100  |
| H    | 5.87989700  | -1.06146500 | 1.38976600  |
| H    | 6.31111900  | 0.18980800  | 0.18295200  |
| C    | -2.76082100 | 2.01824200  | -1.70701100 |
| C    | -3.10110000 | 3.25236200  | -0.81122100 |
| H    | -3.99271500 | 3.09147900  | -0.18402600 |
| H    | -3.22982600 | 4.18573500  | -1.38018600 |
| C    | 5.23688300  | -1.00236800 | -1.86548100 |
| H    | 5.37522300  | 0.05403700  | -2.14260100 |
| H    | 6.21710500  | -1.50493300 | -1.90730300 |
| H    | 4.57992100  | -1.46776500 | -2.61575800 |



|    |             |             |             |
|----|-------------|-------------|-------------|
| O  | 4.56557200  | 0.52870700  | 1.24162800  |
| O  | -1.96076000 | 3.39833100  | 0.05150900  |
| Bi | 0.47852500  | -0.74352600 | -0.68740100 |
| C  | -2.97721300 | -1.27779800 | 2.40852700  |
| C  | -1.77392700 | -0.88537700 | 1.80903100  |
| C  | -1.53504300 | -1.18400100 | 0.47185900  |
| C  | -2.54312900 | -1.88567400 | -0.17681900 |
| C  | -3.71154800 | -2.24110400 | 0.50314300  |
| N  | -3.91327200 | -1.93618000 | 1.76387700  |
| F  | -3.20086300 | -0.97871100 | 3.68708100  |
| F  | -0.87401500 | -0.21903500 | 2.54620400  |
| F  | -2.42027500 | -2.21946500 | -1.47777200 |
| F  | -4.67133300 | -2.90756300 | -0.13724700 |
| H  | 1.21218000  | -1.75504000 | 0.63868700  |

5-2

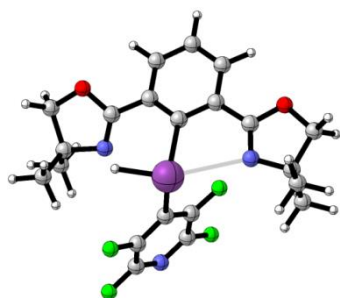

B3LYP electronic energy: -1739.8742377 a.u.  
 B3LYP enthalpy: -1739.466315 a.u.  
 B3LYP free energy: -1739.562157 a.u.  
 B3LYP SCF energy in solution: -1741.7551949 a.u.  
 B3LYP enthalpy in solution: -1741.3472719 a.u.  
 B3LYP free energy in solution: -1741.4431139 a.u.

Cartesian coordinates

| ATOM | X           | Y           | Z          |
|------|-------------|-------------|------------|
| C    | 1.95627700  | -1.87648400 | 0.63389500 |
| C    | 0.64184500  | -1.62494500 | 0.16816500 |
| C    | -0.37436800 | -2.53333900 | 0.54250900 |
| C    | -0.05215700 | -3.70451200 | 1.25869500 |
| C    | 1.25403500  | -3.96221200 | 1.66122300 |
| C    | 2.25194400  | -3.03617400 | 1.37428600 |
| H    | -0.85429000 | -4.40056200 | 1.50802300 |
| H    | 1.48910900  | -4.87123300 | 2.21968200 |
| H    | 3.27356700  | -3.19558500 | 1.71966800 |
| C    | -1.82467800 | -2.30311800 | 0.32013900 |
| C    | -3.87722800 | -1.45504600 | 0.16040700 |

|    |             |             |             |
|----|-------------|-------------|-------------|
| C  | 3.05829700  | -0.90844300 | 0.43598700  |
| N  | -2.43981500 | -1.19078800 | 0.36750100  |
| N  | 2.99609200  | 0.20556300  | -0.18418000 |
| C  | 4.86890800  | 1.22116300  | -1.42798000 |
| H  | 4.19868700  | 1.90084900  | -1.97573800 |
| H  | 5.85251100  | 1.70998500  | -1.33475200 |
| H  | 4.99298100  | 0.30611600  | -2.02774500 |
| C  | 4.08237400  | 2.17855500  | 0.77450600  |
| H  | 5.04107900  | 2.69812400  | 0.93701800  |
| H  | 3.40256500  | 2.86408400  | 0.24640900  |
| H  | 3.63394600  | 1.94918200  | 1.75277400  |
| C  | -4.68003400 | -0.85766400 | 1.32200900  |
| H  | -5.75334800 | -1.08611100 | 1.21534200  |
| H  | -4.33271900 | -1.25987100 | 2.28629800  |
| H  | -4.56146600 | 0.23596100  | 1.34762100  |
| C  | -3.94427300 | -3.01593400 | 0.13833500  |
| H  | -4.43854500 | -3.43475600 | 1.03098100  |
| H  | -4.43309400 | -3.42175100 | -0.76023900 |
| C  | 4.29030200  | 0.89633900  | -0.04542200 |
| C  | 5.15516800  | -0.15575400 | 0.72111900  |
| H  | 5.56871800  | 0.22467000  | 1.66751100  |
| H  | 5.97854400  | -0.56146000 | 0.11111800  |
| C  | -4.32189100 | -0.84317500 | -1.17702500 |
| H  | -3.77915100 | -1.30231700 | -2.01755000 |
| H  | -5.40235700 | -0.99729400 | -1.33378600 |
| H  | -4.11384600 | 0.23606100  | -1.19749300 |
| O  | -2.57012200 | -3.43382700 | 0.13902200  |
| O  | 4.24305900  | -1.22445300 | 1.02079200  |
| Bi | 0.35114400  | 0.06140000  | -1.42514900 |
| C  | -0.96301800 | 2.74980900  | 2.07787100  |
| C  | -0.26151200 | 1.83161200  | 1.28739800  |
| C  | -0.70129300 | 1.56072200  | -0.00414000 |
| C  | -1.82416300 | 2.26102100  | -0.42979900 |
| C  | -2.46021000 | 3.15386700  | 0.43689500  |
| N  | -2.02995400 | 3.38581400  | 1.65509900  |
| F  | -0.54066000 | 3.00010100  | 3.31528500  |
| F  | 0.81574600  | 1.22492400  | 1.80490000  |
| F  | -2.32489700 | 2.07943000  | -1.66303900 |
| F  | -3.54822600 | 3.80258100  | 0.02637300  |
| H  | -1.23925500 | -0.64917900 | -1.98131200 |

ts1

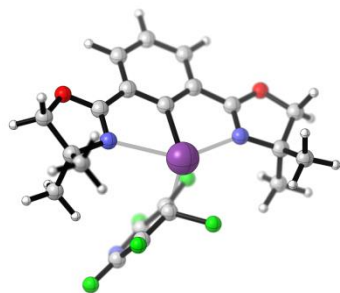

B3LYP electronic energy: -1839.0445142 a.u.  
 B3LYP enthalpy: -1838.640820 a.u.  
 B3LYP free energy: -1838.732478 a.u.  
 B3LYP SCF energy in solution: -1841.06267862 a.u.  
 B3LYP enthalpy in solution: -1840.65898462 a.u.  
 B3LYP free energy in solution: -1840.75064162 a.u.

Cartesian coordinates

| ATOM | X           | Y           | Z           |
|------|-------------|-------------|-------------|
| C    | 0.43638700  | 2.50720900  | 1.07289000  |
| C    | -0.58392400 | 1.69905700  | 0.55495200  |
| C    | -1.89453700 | 1.86062100  | 1.02355500  |
| C    | -2.18576600 | 2.80758900  | 2.01793800  |
| C    | -1.15486100 | 3.59730000  | 2.53945500  |
| C    | 0.15509200  | 3.45744500  | 2.06915000  |
| H    | -3.21079700 | 2.92103100  | 2.37755100  |
| H    | -1.37550300 | 4.33132700  | 3.31742000  |
| H    | 0.95915600  | 4.07907500  | 2.46890200  |
| C    | -2.89477200 | 0.99052900  | 0.40210900  |
| C    | -3.81574200 | -0.66248700 | -0.82437200 |
| C    | -4.90969900 | 0.21827400  | -0.15241800 |
| H    | -5.43440700 | 0.87094700  | -0.87024400 |
| H    | -5.64571300 | -0.35753600 | 0.42399700  |
| C    | 1.76959100  | 2.30316000  | 0.49908900  |
| C    | 3.48094200  | 1.44775200  | -0.69022000 |
| C    | 3.90104900  | 2.76540600  | 0.02850400  |
| H    | 4.80124900  | 2.66062100  | 0.64904800  |
| H    | 4.03538800  | 3.60882900  | -0.66887000 |
| N    | -2.59582000 | 0.12592900  | -0.50729100 |
| N    | 2.02450000  | 1.40999600  | -0.39677000 |
| O    | -4.17981800 | 1.06907800  | 0.76442000  |
| O    | 2.78691100  | 3.08039100  | 0.89391700  |
| C    | 4.17172400  | 0.22812500  | -0.06146700 |
| H    | 3.79484600  | -0.70530500 | -0.49756700 |
| H    | 5.25823300  | 0.27913800  | -0.23864700 |
| H    | 4.00143000  | 0.19587700  | 1.02576100  |
| C    | 3.72361900  | 1.49920300  | -2.20030000 |

|    |             |             |             |
|----|-------------|-------------|-------------|
| H  | 4.79878400  | 1.60494200  | -2.41647100 |
| H  | 3.37513600  | 0.56803500  | -2.67215200 |
| H  | 3.19094700  | 2.34599700  | -2.66013300 |
| C  | -3.72624100 | -2.04560100 | -0.16123100 |
| H  | -4.63825100 | -2.62387800 | -0.38273100 |
| H  | -2.84565300 | -2.58550700 | -0.53142000 |
| H  | -3.62394800 | -1.94966700 | 0.92973000  |
| C  | -4.00266200 | -0.78440100 | -2.33753800 |
| H  | -3.19152600 | -1.39026100 | -2.76884900 |
| H  | -4.95646900 | -1.28418100 | -2.57044400 |
| H  | -4.00055800 | 0.20463400  | -2.82201000 |
| Bi | -0.16386400 | 0.21219400  | -1.11070500 |
| C  | 0.70464200  | -2.75251400 | 2.28459400  |
| C  | -0.08064100 | -2.01768000 | 1.41117200  |
| C  | 0.32720800  | -1.81227100 | 0.06606100  |
| C  | 1.61419700  | -2.34685700 | -0.20260600 |
| C  | 2.31759000  | -3.04583100 | 0.75911600  |
| N  | 1.87718000  | -3.27616800 | 1.98028200  |
| F  | 0.26901600  | -2.92764000 | 3.53807400  |
| F  | -1.22904400 | -1.44444700 | 1.85275900  |
| F  | -0.74419400 | -2.37407000 | -1.01862500 |
| F  | 2.18256900  | -2.07889800 | -1.41349400 |
| F  | 3.54292200  | -3.49544000 | 0.45293000  |

ts2

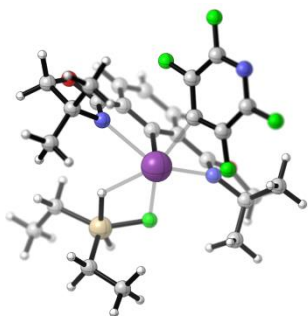

B3LYP electronic energy: -2288.0491494 a.u.  
 B3LYP enthalpy: -2287.487688 a.u.  
 B3LYP free energy: -2287.604753 a.u.  
 B3LYP SCF energy in solution: -2290.38577416 a.u.  
 B3LYP enthalpy in solution: -2289.82431316 a.u.  
 B3LYP free energy in solution: -2289.94137816 a.u.

Cartesian coordinates

| ATOM | X          | Y           | Z          |
|------|------------|-------------|------------|
| C    | 0.38020200 | -0.80439700 | 2.49594200 |

|    |             |             |             |
|----|-------------|-------------|-------------|
| C  | 0.41170000  | 0.25124800  | 1.58324800  |
| C  | 0.66465600  | 1.55267200  | 2.02017000  |
| C  | 0.91621700  | 1.80247800  | 3.37921700  |
| C  | 0.90460900  | 0.73821200  | 4.28688700  |
| C  | 0.63514700  | -0.56533800 | 3.85636100  |
| H  | 1.11743900  | 2.82110700  | 3.71709100  |
| H  | 1.10365500  | 0.92764900  | 5.34389000  |
| H  | 0.61820900  | -1.39461600 | 4.56658300  |
| C  | 0.62645300  | 2.59517300  | 0.98842100  |
| C  | 0.34080600  | 3.63004000  | -0.99309900 |
| C  | 0.84831600  | 4.63045700  | 0.09515700  |
| H  | 1.87142700  | 4.98839200  | -0.09839100 |
| H  | 0.18319600  | 5.49314000  | 0.24148500  |
| C  | 0.05954800  | -2.12686800 | 1.94130000  |
| C  | -0.54010000 | -3.75223200 | 0.49756600  |
| C  | -0.08534300 | -4.35447800 | 1.86707500  |
| H  | -0.85482500 | -4.97382700 | 2.34988300  |
| H  | 0.85024100  | -4.92913000 | 1.79123900  |
| N  | 0.35367200  | 2.35216600  | -0.24628700 |
| N  | -0.32611300 | -2.30317200 | 0.72706300  |
| O  | 0.87104800  | 3.86585700  | 1.32154600  |
| O  | 0.16872000  | -3.20999900 | 2.71520100  |
| C  | -2.02730100 | -4.01405600 | 0.22212500  |
| H  | -2.35123400 | -3.47261800 | -0.67771200 |
| H  | -2.20354200 | -5.09010800 | 0.06278800  |
| H  | -2.65076000 | -3.68226000 | 1.06727100  |
| C  | 0.33837500  | -4.24458800 | -0.65853200 |
| H  | 0.29381400  | -5.34360900 | -0.72859200 |
| H  | -0.01758300 | -3.83445400 | -1.61626200 |
| H  | 1.37960200  | -3.92343200 | -0.51630200 |
| C  | -1.09765000 | 3.94791400  | -1.42770000 |
| H  | -1.13744900 | 4.91896400  | -1.94705700 |
| H  | -1.47372300 | 3.17552400  | -2.11542500 |
| H  | -1.76938900 | 3.98393200  | -0.55726500 |
| C  | 1.28603800  | 3.56281500  | -2.19674200 |
| H  | 0.93476500  | 2.81588000  | -2.92511600 |
| H  | 1.32872500  | 4.53821200  | -2.70773800 |
| H  | 2.30269300  | 3.28140100  | -1.88487900 |
| Bi | 0.13647500  | -0.17494900 | -0.62472100 |
| C  | -4.40741100 | 1.22519500  | 0.26631200  |
| C  | -3.00989000 | 1.16456600  | 0.33870200  |
| C  | -2.30151400 | 0.25210000  | -0.43300300 |
| C  | -3.08843900 | -0.54941500 | -1.24911400 |
| C  | -4.48120600 | -0.43501100 | -1.25892100 |

|    |             |             |             |
|----|-------------|-------------|-------------|
| N  | -5.11496600 | 0.44007700  | -0.51302100 |
| F  | -5.06583400 | 2.11101700  | 1.01291100  |
| F  | -2.38734500 | 2.02320200  | 1.17222500  |
| F  | 2.24816300  | -1.68249800 | -0.32360600 |
| F  | -2.51097200 | -1.47776900 | -2.05304500 |
| F  | -5.20849600 | -1.22857300 | -2.04324200 |
| Si | 3.64752300  | -0.58106600 | -0.65489800 |
| H  | 2.37883100  | 0.45007200  | -0.79998500 |
| H  | 4.46507400  | -1.63886900 | 0.07983600  |
| C  | 4.64257200  | 0.93925900  | 0.04116500  |
| C  | 6.14842100  | 0.71401500  | 0.20447400  |
| H  | 4.19408800  | 1.19913600  | 1.02005600  |
| H  | 4.44124400  | 1.80929800  | -0.61329600 |
| H  | 6.65959400  | 1.57799700  | 0.66597300  |
| H  | 6.35255600  | -0.16666700 | 0.83654900  |
| H  | 6.63994400  | 0.52925700  | -0.76616900 |
| C  | 4.07592200  | -0.81559700 | -2.50248500 |
| C  | 3.40566500  | -2.00864000 | -3.19602500 |
| H  | 5.17420400  | -0.92964000 | -2.55815800 |
| H  | 3.84102300  | 0.11865600  | -3.04475200 |
| H  | 3.73058800  | -2.11630100 | -4.24566800 |
| H  | 3.63758800  | -2.95537300 | -2.68096700 |
| H  | 2.30652800  | -1.91391800 | -3.20493300 |

ts3

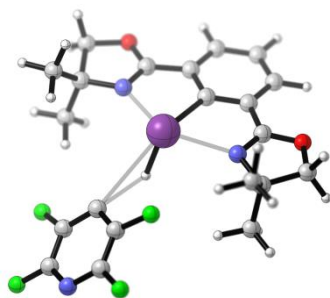

B3LYP electronic energy: -1739.8473703 a.u.  
 B3LYP enthalpy: -1739.441069 a.u.  
 B3LYP free energy: -1739.535131 a.u.  
 B3LYP SCF energy in solution: -1741.73457199 a.u.  
 B3LYP enthalpy in solution: -1741.32827099 a.u.  
 B3LYP free energy in solution: -1741.42233299 a.u.

Cartesian coordinates

| ATOM | X           | Y           | Z           |
|------|-------------|-------------|-------------|
| C    | -3.04011900 | -1.48202700 | -0.44941200 |

|    |             |             |             |
|----|-------------|-------------|-------------|
| C  | -2.49271300 | -0.20599300 | -0.26582300 |
| C  | -3.24325800 | 0.92515900  | -0.61099200 |
| C  | -4.54225700 | 0.78602800  | -1.12786500 |
| C  | -5.08239300 | -0.49470800 | -1.29570200 |
| C  | -4.33926100 | -1.63321000 | -0.96247400 |
| H  | -5.12072400 | 1.67249600  | -1.39783700 |
| H  | -6.09210900 | -0.60680400 | -1.69666800 |
| H  | -4.75905200 | -2.63197800 | -1.10245300 |
| C  | -2.56677600 | 2.21285500  | -0.41415600 |
| C  | -0.95775600 | 3.73373100  | 0.03565000  |
| C  | -2.15307400 | -2.59690100 | -0.09979000 |
| N  | -1.36296900 | 2.30813100  | 0.04053800  |
| N  | -0.94946500 | -2.42090800 | 0.33277800  |
| C  | 0.71810100  | -3.90628900 | -0.70232800 |
| H  | 1.50679200  | -3.14101300 | -0.65813600 |
| H  | 1.19923000  | -4.89620300 | -0.64541800 |
| H  | 0.21242400  | -3.82528000 | -1.67763600 |
| C  | 0.40048800  | -3.89732000 | 1.80603500  |
| H  | 0.81560800  | -4.91208500 | 1.91382800  |
| H  | 1.23333600  | -3.18342300 | 1.89410600  |
| H  | -0.30482500 | -3.71992400 | 2.63282200  |
| C  | -0.44604000 | 4.15193200  | 1.41806400  |
| H  | -0.22096300 | 5.23043200  | 1.43406200  |
| H  | -1.19408700 | 3.94149700  | 2.19822400  |
| H  | 0.47978400  | 3.60923600  | 1.65999200  |
| C  | -2.30366200 | 4.43226900  | -0.33894000 |
| H  | -2.76395900 | 4.95769100  | 0.51284100  |
| H  | -2.21660300 | 5.12529500  | -1.18737600 |
| C  | -0.28717600 | -3.74461500 | 0.44752700  |
| C  | -1.50904900 | -4.69877300 | 0.28627500  |
| H  | -1.86086600 | -5.10684300 | 1.24791300  |
| H  | -1.33490100 | -5.52391500 | -0.41741800 |
| C  | 0.12411600  | 3.95236700  | -1.03275100 |
| H  | -0.23507900 | 3.64635500  | -2.02780400 |
| H  | 0.40489700  | 5.01703400  | -1.07721700 |
| H  | 1.02130000  | 3.36785900  | -0.78572500 |
| O  | -3.19042600 | 3.35536400  | -0.72585300 |
| O  | -2.56286300 | -3.86162100 | -0.24966900 |
| Bi | -0.39754200 | 0.02031600  | 0.62086300  |
| C  | 4.41318600  | 1.48787000  | 0.01863800  |
| C  | 3.12017800  | 0.97534000  | 0.12546800  |
| C  | 2.78250800  | -0.30442400 | -0.25924900 |
| C  | 3.85657100  | -1.02214400 | -0.75525200 |
| C  | 5.13825300  | -0.46443400 | -0.83704600 |

|   |            |             |             |
|---|------------|-------------|-------------|
| N | 5.40454600 | 0.76810800  | -0.45739100 |
| F | 4.68662900 | 2.74349200  | 0.40191900  |
| F | 2.14580800 | 1.82529100  | 0.63728400  |
| F | 3.70981400 | -2.30893400 | -1.17767600 |
| F | 6.15848300 | -1.18687900 | -1.31705900 |
| H | 0.76146800 | -0.14087600 | -0.77454100 |

Ts2-1

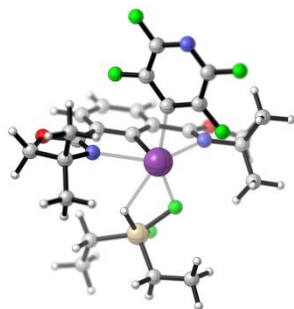

|                                |                     |
|--------------------------------|---------------------|
| B3LYP electronic energy:       | -2387.2888377 a.u.  |
| B3LYP enthalpy:                | -2386.731452 a.u.   |
| B3LYP free energy:             | -2386.850271 a.u.   |
| B3LYP SCF energy in solution:  | -2389.75803444 a.u. |
| B3LYP enthalpy in solution:    | -2389.20064844 a.u. |
| B3LYP free energy in solution: | -2389.31946744 a.u. |

Cartesian coordinates

| ATOM | X           | Y           | Z           |
|------|-------------|-------------|-------------|
| C    | 0.50020200  | -0.71468700 | 2.40982500  |
| C    | 0.36826900  | 0.33825700  | 1.50437600  |
| C    | 0.55757600  | 1.65668900  | 1.91992100  |
| C    | 0.89933300  | 1.92951100  | 3.25454400  |
| C    | 1.04498000  | 0.86996600  | 4.15637000  |
| C    | 0.84774700  | -0.45257600 | 3.74508700  |
| H    | 1.05061400  | 2.96136800  | 3.57792200  |
| H    | 1.31668700  | 1.07764800  | 5.19351400  |
| H    | 0.96127200  | -1.27855500 | 4.45015600  |
| C    | 0.36637600  | 2.68596400  | 0.89183300  |
| C    | -0.13645800 | 3.68234200  | -1.06632200 |
| C    | 0.38289600  | 4.72351200  | -0.02279400 |
| H    | 1.36261000  | 5.14671800  | -0.29335500 |
| H    | -0.32539000 | 5.54155400  | 0.17009400  |
| C    | 0.25002200  | -2.05862800 | 1.87113000  |
| C    | -0.31803400 | -3.72639600 | 0.46102700  |
| C    | 0.31325200  | -4.28794300 | 1.77596900  |
| H    | -0.34302500 | -4.98885400 | 2.31104000  |



|    |             |             |             |
|----|-------------|-------------|-------------|
| H  | 1.29482000  | -4.75765900 | 1.61209300  |
| N  | 0.01781000  | 2.41411900  | -0.31817300 |
| N  | -0.21881400 | -2.26339300 | 0.68949400  |
| O  | 0.54798600  | 3.97226500  | 1.20111200  |
| O  | 0.51717200  | -3.12945700 | 2.61922800  |
| C  | -1.79316700 | -4.12789400 | 0.32020100  |
| H  | -2.24557700 | -3.62970100 | -0.54844700 |
| H  | -1.87992100 | -5.21724500 | 0.17803100  |
| H  | -2.36689600 | -3.84985500 | 1.21831900  |
| C  | 0.49192600  | -4.13009900 | -0.77606200 |
| H  | 0.53426900  | -5.22810500 | -0.86097700 |
| H  | 0.01677700  | -3.74267800 | -1.69070000 |
| H  | 1.51059300  | -3.72215200 | -0.72067400 |
| C  | -1.62136900 | 3.90078800  | -1.39292300 |
| H  | -1.76521600 | 4.86682600  | -1.90304800 |
| H  | -1.99361000 | 3.10544200  | -2.05627100 |
| H  | -2.22850500 | 3.89029600  | -0.47557500 |
| C  | 0.71883100  | 3.66863100  | -2.33721200 |
| H  | 0.36199800  | 2.89739600  | -3.03716000 |
| H  | 0.66047900  | 4.64198600  | -2.85043700 |
| H  | 1.77189200  | 3.45447400  | -2.10178400 |
| Bi | -0.02741200 | -0.12670100 | -0.67445200 |
| C  | -4.58066300 | 0.86273400  | 0.46079200  |
| C  | -3.18088500 | 0.92067100  | 0.45444100  |
| C  | -2.44615500 | 0.06151000  | -0.35400200 |
| C  | -3.20620300 | -0.81192400 | -1.12103900 |
| C  | -4.60178900 | -0.81384700 | -1.04982500 |
| N  | -5.26178100 | 0.01327100  | -0.27280700 |
| F  | -5.26676300 | 1.69815100  | 1.23811100  |
| F  | -2.58470700 | 1.83298000  | 1.24564500  |
| F  | 2.19571000  | -1.43968000 | -0.53800400 |
| F  | -2.59716000 | -1.69378600 | -1.95093900 |
| F  | -5.30290000 | -1.67295300 | -1.78581800 |
| Si | 3.52888100  | -0.21785900 | -0.66885800 |
| H  | 2.25152300  | 0.70968900  | -0.93591200 |
| C  | 4.44734900  | 1.38961800  | -0.09544600 |
| C  | 5.94414800  | 1.27641800  | 0.21362600  |
| H  | 3.91160200  | 1.76366400  | 0.79961900  |
| H  | 4.26233200  | 2.15194600  | -0.87844100 |
| H  | 6.38309300  | 2.23633400  | 0.54149600  |
| H  | 6.12106600  | 0.53448900  | 1.00715000  |
| H  | 6.51793700  | 0.94525800  | -0.66910600 |
| C  | 4.23988400  | -0.67949000 | -2.36663000 |
| C  | 3.66402400  | -1.91433800 | -3.06965600 |

|   |            |             |             |
|---|------------|-------------|-------------|
| H | 5.32692100 | -0.81374900 | -2.21725500 |
| H | 4.14269000 | 0.20905800  | -3.01809300 |
| H | 4.17242500 | -2.11880100 | -4.02808100 |
| H | 3.76550800 | -2.81512200 | -2.44369700 |
| H | 2.58944700 | -1.79829700 | -3.28789200 |
| F | 4.28227300 | -1.16808800 | 0.49381200  |

ts3-1

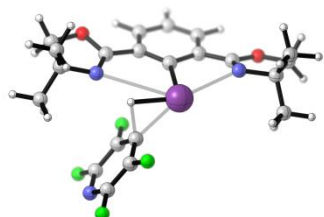

|                                |                     |
|--------------------------------|---------------------|
| B3LYP electronic energy:       | -1739.8316558 a.u.  |
| B3LYP enthalpy:                | -1739.426027 a.u.   |
| B3LYP free energy:             | -1739.520895 a.u.   |
| B3LYP SCF energy in solution:  | -1741.71033468 a.u. |
| B3LYP enthalpy in solution:    | -1741.30470668 a.u. |
| B3LYP free energy in solution: | -1741.39957368 a.u. |

Cartesian coordinates

| ATOM | X           | Y           | Z           |
|------|-------------|-------------|-------------|
| C    | -0.02577100 | 2.45812400  | 0.24427900  |
| C    | -0.96803900 | 1.39457500  | 0.19893400  |
| C    | -2.27225500 | 1.67162200  | 0.69284800  |
| C    | -2.59179200 | 2.89199500  | 1.31427300  |
| C    | -1.63259200 | 3.89107400  | 1.41663800  |
| C    | -0.37644200 | 3.68080600  | 0.85927900  |
| H    | -3.60189100 | 3.04335000  | 1.69690200  |
| H    | -1.86736900 | 4.84045200  | 1.90294300  |
| H    | 0.36743000  | 4.47563100  | 0.88940700  |
| C    | -3.37756800 | 0.71598000  | 0.50925200  |
| C    | -4.65730100 | -1.00311100 | -0.15937600 |
| C    | -5.47554500 | -0.03875600 | 0.75663200  |
| H    | -6.28117600 | 0.48317400  | 0.21488300  |
| H    | -5.90267500 | -0.53177600 | 1.64227500  |
| C    | 1.33156100  | 2.44112900  | -0.36267100 |
| C    | 3.28175800  | 1.96716300  | -1.35863300 |
| C    | 3.24065800  | 3.47549700  | -0.96630800 |
| H    | 3.96364500  | 3.72799500  | -0.17261100 |
| H    | 3.39584900  | 4.15559800  | -1.81755500 |
| N    | -3.36539800 | -0.29770400 | -0.27604600 |

|    |             |             |             |
|----|-------------|-------------|-------------|
| N  | 2.01133000  | 1.45910800  | -0.81063200 |
| O  | -4.51986900 | 0.94054300  | 1.19921100  |
| O  | 1.91638900  | 3.67487600  | -0.45821700 |
| C  | 4.46339500  | 1.23748500  | -0.70834400 |
| H  | 4.44572300  | 0.16676000  | -0.96108800 |
| H  | 5.42054400  | 1.65617000  | -1.06039600 |
| H  | 4.42624400  | 1.32863400  | 0.38800400  |
| C  | 3.28822500  | 1.76893100  | -2.88216500 |
| H  | 4.22713100  | 2.14585600  | -3.32004100 |
| H  | 3.19324400  | 0.70141500  | -3.13143900 |
| H  | 2.44722200  | 2.30403300  | -3.35034100 |
| C  | -4.43943200 | -2.37232600 | 0.50259500  |
| H  | -5.39622700 | -2.90890600 | 0.60985300  |
| H  | -3.76388500 | -2.99243900 | -0.10589000 |
| H  | -3.99120200 | -2.25989600 | 1.50200500  |
| C  | -5.29415400 | -1.16242000 | -1.54467500 |
| H  | -4.66399500 | -1.79462500 | -2.18845900 |
| H  | -6.28711200 | -1.63466100 | -1.46673700 |
| H  | -5.41142400 | -0.18485900 | -2.03693100 |
| Bi | -0.69260800 | -0.79681400 | -0.60929800 |
| C  | 3.27665000  | -1.15802800 | 1.93692000  |
| C  | 2.08415300  | -0.63829600 | 1.43011900  |
| C  | 1.42659900  | -1.30289700 | 0.38790900  |
| C  | 2.01753900  | -2.51084900 | -0.01282300 |
| C  | 3.19974900  | -2.95159300 | 0.57408400  |
| N  | 3.81942800  | -2.27965500 | 1.52124500  |
| F  | 3.91357300  | -0.48364800 | 2.89660400  |
| F  | 1.58735900  | 0.48392100  | 1.96640100  |
| F  | 1.44183400  | -3.22984500 | -0.99476400 |
| F  | 3.74294200  | -4.10047200 | 0.17199800  |
| H  | 1.16899600  | -0.44818400 | -0.96772900 |

The following are the details of the calculation data for each species in Figure 4:

3b

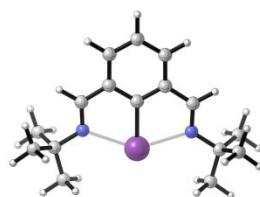

B3LYP electronic energy: -947.2521549 a.u.

B3LYP enthalpy: -946.874346 a.u.

B3LYP free energy: -946.945497 a.u.

B3LYP SCF energy in solution: -948.1686859 a.u.  
B3LYP enthalpy in solution: -947.790876893 a.u.  
B3LYP free energy in solution: -947.862027893 a.u.

Cartesian coordinates

| ATOM | X           | Y           | Z           |
|------|-------------|-------------|-------------|
| C    | 1.22687200  | 2.09497100  | -0.00000100 |
| C    | 0.00007300  | 1.38322700  | 0.00002200  |
| C    | -1.22671700 | 2.09501300  | 0.00002800  |
| C    | -1.21336100 | 3.50072400  | 0.00001100  |
| C    | 0.00012700  | 4.19985300  | -0.00002400 |
| C    | 1.21362800  | 3.50062300  | -0.00002500 |
| H    | -2.15891500 | 4.05294900  | 0.00000400  |
| H    | 0.00018600  | 5.29219600  | -0.00005600 |
| H    | 2.15919700  | 4.05282200  | -0.00005200 |
| C    | -2.44623500 | 1.31806500  | 0.00001800  |
| C    | -3.64586100 | -0.78081200 | -0.00004800 |
| C    | -4.46876500 | -0.47334700 | -1.26717300 |
| H    | -3.86747800 | -0.65832900 | -2.17081400 |
| H    | -5.36417400 | -1.11343200 | -1.31012000 |
| C    | 2.44641900  | 1.31791900  | -0.00002100 |
| C    | 3.64603700  | -0.78091800 | -0.00003400 |
| C    | 4.46825400  | -0.47426100 | -1.26778700 |
| H    | 5.36362900  | -1.11438900 | -1.31080700 |
| H    | 3.86648900  | -0.65979400 | -2.17099500 |
| N    | -2.39591100 | 0.02017700  | -0.00004300 |
| N    | 2.39610000  | 0.02010800  | 0.00005100  |
| C    | 4.46928000  | -0.47303100 | 1.26675900  |
| H    | 3.86822100  | -0.65761100 | 2.17063300  |
| H    | 5.36465800  | -1.11315600 | 1.30972100  |
| H    | 4.80578900  | 0.57492100  | 1.28924100  |
| C    | 3.25883900  | -2.26772100 | 0.00083900  |
| H    | 4.15831300  | -2.90271000 | 0.00089500  |
| H    | 2.66540500  | -2.51788800 | 0.89418600  |
| H    | 2.66489900  | -2.51879500 | -0.89192200 |
| C    | -4.46841400 | -0.47366900 | 1.26737100  |
| H    | -5.36387600 | -1.11367700 | 1.31035700  |
| H    | -3.86691700 | -0.65895000 | 2.17081100  |
| H    | -4.80471200 | 0.57433000  | 1.29071900  |
| C    | -3.25877800 | -2.26764100 | -0.00029500 |
| H    | -2.66485100 | -2.51838900 | 0.89256600  |
| H    | -4.15831400 | -2.90254500 | -0.00005500 |
| H    | -2.66538900 | -2.51823800 | -0.89355100 |
| Bi   | -0.00013900 | -0.78602500 | 0.00003700  |

|   |             |            |             |
|---|-------------|------------|-------------|
| H | 3.40611400  | 1.85821400 | -0.00005000 |
| H | 4.80470100  | 0.57368300 | -1.29159500 |
| H | -3.40596400 | 1.85826300 | 0.00004900  |
| H | -4.80521400 | 0.57461200 | -1.29016400 |

3c

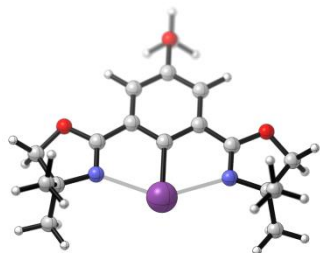

|                                |                     |
|--------------------------------|---------------------|
| B3LYP electronic energy:       | -1209.6140998 a.u.  |
| B3LYP enthalpy:                | -1209.234743 a.u.   |
| B3LYP free energy:             | -1209.310580 a.u.   |
| B3LYP SCF energy in solution:  | -1210.84027125 a.u. |
| B3LYP enthalpy in solution:    | -1210.46091425 a.u. |
| B3LYP free energy in solution: | -1210.53675125 a.u. |

Cartesian coordinates

| ATOM | X           | Y           | Z           |
|------|-------------|-------------|-------------|
| C    | -1.21755300 | 1.50548000  | 0.12316900  |
| C    | -0.00000100 | 0.77837400  | 0.06981900  |
| C    | 1.21755800  | 1.50547700  | 0.12305300  |
| C    | 1.21571700  | 2.90419400  | 0.22308100  |
| C    | 0.00001400  | 3.59994400  | 0.27256400  |
| C    | -1.21569600 | 2.90419400  | 0.22323200  |
| H    | 2.15405000  | 3.46060200  | 0.27657600  |
| H    | -2.15402000 | 3.46061000  | 0.27681100  |
| C    | 2.42319800  | 0.70485900  | 0.07553200  |
| C    | 3.77726200  | -1.09829900 | 0.02521100  |
| C    | 4.60340000  | 0.22419400  | -0.06170600 |
| H    | 5.38392000  | 0.30424400  | 0.70914400  |
| H    | 5.06568800  | 0.36382800  | -1.05354600 |
| C    | -2.42320700 | 0.70487500  | 0.07570600  |
| C    | -3.77730300 | -1.09825100 | 0.02510900  |
| C    | -4.60342900 | 0.22427100  | -0.06146200 |
| H    | -5.06580400 | 0.36410900  | -1.05323300 |
| H    | -5.38388000 | 0.30418100  | 0.70947400  |
| N    | 2.39311000  | -0.58816800 | -0.02426500 |
| N    | -2.39315000 | -0.58812600 | -0.02441900 |
| O    | 3.64658600  | 1.27660100  | 0.14525600  |

|    |             |             |             |
|----|-------------|-------------|-------------|
| O  | -3.64658100 | 1.27662300  | 0.14562400  |
| C  | -4.05803600 | -2.02862300 | -1.15966500 |
| H  | -3.42904300 | -2.93010400 | -1.10121000 |
| H  | -5.11287200 | -2.34923100 | -1.16313100 |
| H  | -3.84186300 | -1.52420400 | -2.11354700 |
| C  | -4.00894700 | -1.82573300 | 1.35945000  |
| H  | -5.04507500 | -2.19653100 | 1.42638000  |
| H  | -3.32639900 | -2.68360500 | 1.45412400  |
| H  | -3.82403700 | -1.15102600 | 2.20952900  |
| C  | 4.05784700  | -2.02890300 | -1.15941600 |
| H  | 5.11267700  | -2.34952900 | -1.16293700 |
| H  | 3.42884400  | -2.93036200 | -1.10072100 |
| H  | 3.84157700  | -1.52466100 | -2.11337000 |
| C  | 4.00905300  | -1.82552600 | 1.35966600  |
| H  | 3.32650700  | -2.68337200 | 1.45458900  |
| H  | 5.04518500  | -2.19632300 | 1.42654800  |
| H  | 3.82425100  | -1.15065100 | 2.20963500  |
| Bi | 0.00000300  | -1.41502000 | -0.09166700 |
| O  | 0.00001500  | 4.96877300  | 0.41524500  |
| C  | 0.00009700  | 5.70825600  | -0.79059900 |
| H  | -0.89605900 | 5.49492800  | -1.40351800 |
| H  | 0.00012100  | 6.77428500  | -0.52050000 |
| H  | 0.89629400  | 5.49486900  | -1.40343700 |

1b

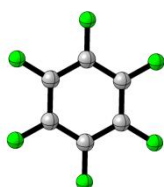

B3LYP electronic energy: -826.987654 a.u.  
 B3LYP enthalpy: -826.925383 a.u.  
 B3LYP free energy: -826.971657 a.u.  
 B3LYP SCF energy in solution: -827.9982371 a.u.  
 B3LYP enthalpy in solution: -827.935966129 a.u.  
 B3LYP free energy in solution: -827.982240129 a.u.

Cartesian coordinates

| ATOM | X           | Y          | Z           |
|------|-------------|------------|-------------|
| C    | -0.76277100 | 1.17151100 | -0.00040600 |
| C    | 0.63320200  | 1.24609500 | 0.00047000  |
| C    | 1.39647800  | 0.07465800 | 0.00006300  |

|   |             |             |             |
|---|-------------|-------------|-------------|
| C | 0.76261000  | -1.17147500 | 0.00049300  |
| C | -0.63336400 | -1.24612200 | -0.00039700 |
| F | -1.48672700 | 2.28388300  | -0.00072300 |
| F | 1.23456100  | 2.42950700  | -0.00002400 |
| F | 2.72172800  | 0.14547500  | 0.00007600  |
| F | 1.48652200  | -2.28403600 | -0.00000900 |
| F | -1.23476900 | -2.42936100 | -0.00074800 |
| C | -1.39603300 | -0.07463900 | 0.00049700  |
| F | -2.72139600 | -0.14548500 | 0.00094800  |

2b

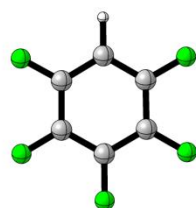

|                                |                     |
|--------------------------------|---------------------|
| B3LYP electronic energy:       | -727.8459993 a.u.   |
| B3LYP enthalpy:                | -727.776446 a.u.    |
| B3LYP free energy:             | -727.819993 a.u.    |
| B3LYP SCF energy in solution:  | -728.735008514 a.u. |
| B3LYP enthalpy in solution:    | -728.665454514 a.u. |
| B3LYP free energy in solution: | -728.709001514 a.u. |

Cartesian coordinates

| ATOM | X           | Y           | Z           |
|------|-------------|-------------|-------------|
| C    | 1.21393900  | 0.42758300  | 0.00066900  |
| C    | 1.19992100  | -0.97019700 | -0.00050700 |
| C    | -0.00000100 | -1.67666200 | -0.00006400 |
| C    | -1.19992300 | -0.97019900 | -0.00049800 |
| C    | -1.21393500 | 0.42758400  | 0.00066400  |
| F    | 2.36202200  | 1.09694500  | 0.00075500  |
| F    | 2.36168300  | -1.62119100 | -0.00013200 |
| F    | -2.36168700 | -1.62118500 | -0.00010400 |
| F    | -2.36201900 | 1.09694400  | 0.00072500  |
| H    | 0.00000900  | -2.76693100 | 0.00041200  |
| C    | -0.00000100 | 1.12205200  | -0.00068600 |
| F    | 0.00000000  | 2.44914800  | -0.00100800 |

ts1a

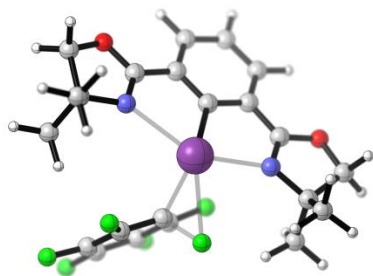

B3LYP electronic energy: -1922.139979 a.u.  
 B3LYP enthalpy: -1921.732383 a.u.  
 B3LYP free energy: -1921.827574 a.u.  
 B3LYP SCF energy in solution: -1924.25718542 a.u.  
 B3LYP enthalpy in solution: -1923.84958942 a.u.  
 B3LYP free energy in solution: -1923.94478042 a.u.

Cartesian coordinates

| ATOM | X           | Y           | Z           |
|------|-------------|-------------|-------------|
| C    | -0.12496200 | 2.51167200  | 1.32167800  |
| C    | -0.98802500 | 1.57067000  | 0.73974400  |
| C    | -2.27661000 | 1.40311600  | 1.27099500  |
| C    | -2.69556500 | 2.15153300  | 2.38195400  |
| C    | -1.81838500 | 3.07487600  | 2.96202300  |
| C    | -0.53620500 | 3.26357400  | 2.43487400  |
| H    | -3.70030600 | 2.00812900  | 2.78569700  |
| H    | -2.13844500 | 3.65549100  | 3.82988800  |
| H    | 0.14627100  | 3.99068800  | 2.88042800  |
| C    | -3.11369300 | 0.42035700  | 0.58411400  |
| C    | -3.74639500 | -1.24290000 | -0.80015400 |
| C    | -4.95833000 | -0.68490700 | 0.00129700  |
| H    | -5.63688000 | -0.07582400 | -0.61970200 |
| H    | -5.53645000 | -1.45952900 | 0.52233200  |
| C    | 1.18438700  | 2.66013800  | 0.68411200  |
| C    | 2.95249900  | 2.33782000  | -0.67434000 |
| C    | 3.15151400  | 3.60462900  | 0.21280300  |
| H    | 4.08944800  | 3.59832000  | 0.78489600  |
| H    | 3.08385000  | 4.54272900  | -0.36269100 |
| N    | -2.69710600 | -0.25663900 | -0.43267800 |
| N    | 1.55890800  | 1.95765100  | -0.33196900 |
| O    | -4.36720900 | 0.18630800  | 0.99453900  |
| O    | 2.04945500  | 3.57590300  | 1.14561100  |
| C    | 3.91598000  | 1.21339700  | -0.26525300 |
| H    | 3.70409900  | 0.29253800  | -0.82334500 |
| H    | 4.95590400  | 1.51238000  | -0.47452400 |
| H    | 3.83041700  | 0.99422800  | 0.81030700  |
| C    | 3.07454700  | 2.64663500  | -2.16888800 |



|    |             |             |             |
|----|-------------|-------------|-------------|
| H  | 4.08858900  | 3.00496600  | -2.40863500 |
| H  | 2.88900500  | 1.73851000  | -2.76232200 |
| H  | 2.35122900  | 3.41798100  | -2.47532200 |
| C  | -3.34334700 | -2.63982300 | -0.30181100 |
| H  | -4.12933600 | -3.36810400 | -0.56091000 |
| H  | -2.39225700 | -2.94220100 | -0.75789300 |
| H  | -3.20710200 | -2.64060700 | 0.78967600  |
| C  | -3.98447500 | -1.24387100 | -2.31084000 |
| H  | -3.08622700 | -1.60991400 | -2.83065900 |
| H  | -4.82074000 | -1.91278300 | -2.56990500 |
| H  | -4.21925500 | -0.23332200 | -2.68004900 |
| Bi | -0.37370200 | 0.40030300  | -1.10226000 |
| C  | 1.32220000  | -2.75935900 | 1.85653600  |
| C  | 0.36389500  | -2.12556000 | 1.07152800  |
| C  | 0.63284800  | -1.66344000 | -0.23575000 |
| C  | 1.95887400  | -1.86446700 | -0.67459900 |
| C  | 2.93402000  | -2.48075100 | 0.09829400  |
| F  | 1.00940400  | -3.16689500 | 3.09130300  |
| F  | -0.84423200 | -1.86829700 | 1.62575100  |
| F  | -0.42857500 | -2.23159800 | -1.35046300 |
| F  | 2.33124000  | -1.30999300 | -1.86078000 |
| F  | 4.18487000  | -2.58843600 | -0.36699500 |
| C  | 2.62071200  | -2.95943700 | 1.37445300  |
| F  | 3.53640400  | -3.60222900 | 2.11285200  |

ts2a

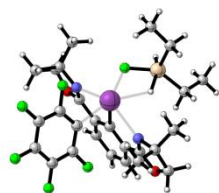

B3LYP electronic energy: -2371.1557075 a.u.  
 B3LYP enthalpy: -2370.589837 a.u.  
 B3LYP free energy: -2370.709958 a.u.  
 B3LYP SCF energy in solution: -2373.59621487 a.u.  
 B3LYP enthalpy in solution: -2373.03034487 a.u.  
 B3LYP free energy in solution: -2373.15046487 a.u.

Cartesian coordinates

| ATOM | X           | Y           | Z          |
|------|-------------|-------------|------------|
| C    | -0.60773800 | 0.79276000  | 2.50142500 |
| C    | -0.58638600 | -0.26100200 | 1.58605300 |

|    |             |             |             |
|----|-------------|-------------|-------------|
| C  | -0.82999400 | -1.56786600 | 2.01210300  |
| C  | -1.12090700 | -1.82629100 | 3.36157700  |
| C  | -1.15863500 | -0.76462100 | 4.27161800  |
| C  | -0.90165700 | 0.54509700  | 3.85246200  |
| H  | -1.31486300 | -2.84935800 | 3.69020800  |
| H  | -1.38841400 | -0.96069700 | 5.32117000  |
| H  | -0.92547300 | 1.37284000  | 4.56430100  |
| C  | -0.74340100 | -2.60614900 | 0.97910800  |
| C  | -0.38201100 | -3.62949300 | -0.99551800 |
| C  | -0.90629600 | -4.64157100 | 0.07380600  |
| H  | -1.91821400 | -5.01299100 | -0.15095200 |
| H  | -0.23362900 | -5.49563400 | 0.23574000  |
| C  | -0.30217800 | 2.12400300  | 1.95946600  |
| C  | 0.29364200  | 3.76794300  | 0.53560100  |
| C  | -0.20468900 | 4.35474600  | 1.89672400  |
| H  | 0.54101900  | 4.98706400  | 2.39977700  |
| H  | -1.14921100 | 4.91153000  | 1.80108100  |
| N  | -0.43961600 | -2.35465100 | -0.24638200 |
| N  | 0.10976200  | 2.31385700  | 0.75618100  |
| O  | -0.97521000 | -3.88253000 | 1.30163800  |
| O  | -0.45575900 | 3.20194500  | 2.73395000  |
| C  | 1.77951500  | 4.06654600  | 0.29187700  |
| H  | 2.13418900  | 3.53678500  | -0.60333400 |
| H  | 1.93330700  | 5.14716800  | 0.14013700  |
| H  | 2.39319100  | 3.74575000  | 1.14835500  |
| C  | -0.57196600 | 4.24270300  | -0.63758900 |
| H  | -0.55054400 | 5.34262800  | -0.70508600 |
| H  | -0.18787500 | 3.84181700  | -1.58830600 |
| H  | -1.60821600 | 3.89746500  | -0.51740200 |
| C  | 1.07460500  | -3.92144800 | -1.38592400 |
| H  | 1.14696700  | -4.88999400 | -1.90657600 |
| H  | 1.45867700  | -3.13999300 | -2.05880400 |
| H  | 1.71935700  | -3.94865400 | -0.49496700 |
| C  | -1.29023400 | -3.57506100 | -2.22791500 |
| H  | -0.92848500 | -2.82132500 | -2.94401000 |
| H  | -1.30145400 | -4.55024200 | -2.74099900 |
| H  | -2.32021400 | -3.30994000 | -1.94713200 |
| Bi | -0.25011000 | 0.17686800  | -0.61221000 |
| C  | 4.28193700  | -1.15597600 | 0.41730900  |
| C  | 2.88508200  | -1.08085400 | 0.41381500  |
| C  | 2.17957800  | -0.18497300 | -0.37949300 |
| C  | 2.94711000  | 0.64242800  | -1.18716900 |
| C  | 4.34292100  | 0.62133200  | -1.22132600 |
| F  | 4.92632200  | -2.03347500 | 1.18919300  |

|    |             |             |             |
|----|-------------|-------------|-------------|
| F  | 2.24311500  | -1.94277000 | 1.23081200  |
| F  | -2.42202300 | 1.64012700  | -0.36645300 |
| F  | 2.33219100  | 1.54693800  | -1.99358800 |
| F  | 5.03608000  | 1.44799500  | -2.00564600 |
| Si | -3.78454300 | 0.51128800  | -0.73590300 |
| H  | -2.49512000 | -0.49409600 | -0.85155000 |
| H  | -4.65050800 | 1.56513200  | -0.04882800 |
| C  | -4.76285400 | -1.01545700 | -0.03052200 |
| C  | -6.27624100 | -0.82119300 | 0.09896500  |
| H  | -4.32854000 | -1.24672900 | 0.96191900  |
| H  | -4.52925500 | -1.89341300 | -0.66337400 |
| H  | -6.77739700 | -1.68653100 | 0.56903600  |
| H  | -6.51233100 | 0.06806700  | 0.70746800  |
| H  | -6.75236300 | -0.66811500 | -0.88483700 |
| C  | -4.17316400 | 0.71123400  | -2.59748000 |
| C  | -3.47952800 | 1.88779700  | -3.29628800 |
| H  | -5.26904800 | 0.83070100  | -2.68133700 |
| H  | -3.92956200 | -0.23364000 | -3.11709200 |
| H  | -3.78091800 | 1.98070100  | -4.35444800 |
| H  | -3.71466900 | 2.84482200  | -2.80203600 |
| H  | -2.38108000 | 1.78433700  | -3.28080900 |
| C  | 5.01280700  | -0.29561300 | -0.40697500 |
| F  | 6.34256100  | -0.34964500 | -0.41530000 |

ts3a

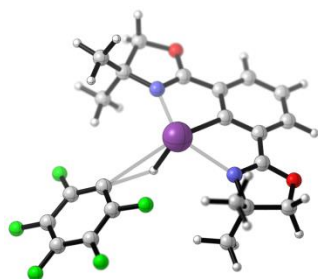

|                                |                     |
|--------------------------------|---------------------|
| B3LYP electronic energy:       | -1822.9522953 a.u.  |
| B3LYP enthalpy:                | -1822.541625 a.u.   |
| B3LYP free energy:             | -1822.638246 a.u.   |
| B3LYP SCF energy in solution:  | -1824.94243979 a.u. |
| B3LYP enthalpy in solution:    | -1824.53176979 a.u. |
| B3LYP free energy in solution: | -1824.62839079 a.u. |

Cartesian coordinates

| ATOM | X          | Y          | Z           |
|------|------------|------------|-------------|
| C    | 3.32531900 | 1.25449700 | -0.46291400 |
| C    | 2.67331800 | 0.02875500 | -0.27763700 |

|    |             |             |             |
|----|-------------|-------------|-------------|
| C  | 3.32915100  | -1.16109800 | -0.61900400 |
| C  | 4.63562700  | -1.13105900 | -1.13488100 |
| C  | 5.27958400  | 0.10036400  | -1.30570600 |
| C  | 4.63308100  | 1.29702300  | -0.97473700 |
| H  | 5.13982500  | -2.06280000 | -1.40142300 |
| H  | 6.29546700  | 0.12767200  | -1.70589200 |
| H  | 5.13500000  | 2.25714700  | -1.11486100 |
| C  | 2.55066500  | -2.38880600 | -0.41648100 |
| C  | 0.82595100  | -3.77374800 | 0.04228400  |
| C  | 2.53545200  | 2.43965200  | -0.11148900 |
| N  | 1.34209700  | -2.38453700 | 0.03521200  |
| N  | 1.31867000  | 2.36687400  | 0.31405900  |
| C  | -0.20683800 | 4.01113700  | -0.70232800 |
| H  | -1.06559700 | 3.32536400  | -0.66469700 |
| H  | -0.59000000 | 5.04241600  | -0.63520300 |
| H  | 0.28950200  | 3.89203200  | -1.67854100 |
| C  | 0.10480500  | 3.93844600  | 1.80547900  |
| H  | -0.22125500 | 4.98385300  | 1.92594700  |
| H  | -0.78617000 | 3.29739600  | 1.88473500  |
| H  | 0.79159000  | 3.69048200  | 2.62968500  |
| C  | 0.28398500  | -4.13812200 | 1.42848000  |
| H  | -0.02518600 | -5.19546300 | 1.45424900  |
| H  | 1.04744200  | -3.98024500 | 2.20617000  |
| H  | -0.59540800 | -3.52144400 | 1.66555000  |
| C  | 2.11199100  | -4.57997400 | -0.32644200 |
| H  | 2.52747100  | -5.13635900 | 0.52871300  |
| H  | 1.96998500  | -5.26849200 | -1.17118000 |
| C  | 0.77793100  | 3.74303000  | 0.44515800  |
| C  | 2.08011300  | 4.58684100  | 0.29513600  |
| H  | 2.46466900  | 4.95398600  | 1.26079300  |
| H  | 1.98024300  | 5.43032600  | -0.40126200 |
| C  | -0.26985800 | -3.91694800 | -1.02462100 |
| H  | 0.11188900  | -3.64831100 | -2.02207200 |
| H  | -0.63227500 | -4.95708600 | -1.06004500 |
| H  | -1.11852700 | -3.26246900 | -0.78266100 |
| O  | 3.08249200  | -3.58003000 | -0.71787100 |
| O  | 3.05657900  | 3.66483700  | -0.24695900 |
| Bi | 0.55857800  | -0.02187600 | 0.60350800  |
| C  | -4.31825500 | -1.20618300 | 0.12326800  |
| C  | -3.00349600 | -0.74323900 | 0.18511000  |
| C  | -2.58022100 | 0.50605400  | -0.20228900 |
| C  | -3.57580000 | 1.33302100  | -0.68596400 |
| C  | -4.91967000 | 0.95702900  | -0.78039800 |
| F  | -4.67096300 | -2.44144600 | 0.51305200  |

|   |             |             |             |
|---|-------------|-------------|-------------|
| F | -2.07356300 | -1.65847500 | 0.67788700  |
| F | -3.28601500 | 2.60103300  | -1.10029300 |
| F | -5.86330000 | 1.78692400  | -1.24907400 |
| H | -0.58941400 | 0.21398100  | -0.79044800 |
| C | -5.28835200 | -0.32998500 | -0.37179700 |
| F | -6.56572300 | -0.71927900 | -0.45428100 |

ts1b

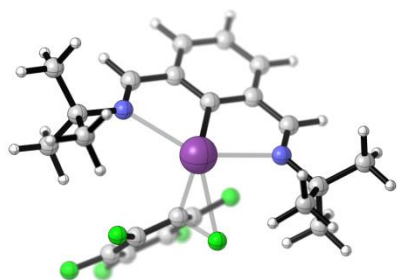

|                                |                     |
|--------------------------------|---------------------|
| B3LYP electronic energy:       | -1774.2004211 a.u.  |
| B3LYP enthalpy:                | -1773.760714 a.u.   |
| B3LYP free energy:             | -1773.856079 a.u.   |
| B3LYP SCF energy in solution:  | -1776.15033317 a.u. |
| B3LYP enthalpy in solution:    | -1775.71062617 a.u. |
| B3LYP free energy in solution: | -1775.80599117 a.u. |

Cartesian coordinates

| ATOM | X           | Y           | Z           |
|------|-------------|-------------|-------------|
| C    | 0.04242000  | -2.09480000 | 1.95010300  |
| C    | 0.96693900  | -1.33382100 | 1.21861900  |
| C    | 2.19327700  | -0.96905800 | 1.79290800  |
| C    | 2.48999100  | -1.35625700 | 3.11128100  |
| C    | 1.56201800  | -2.10051400 | 3.84858700  |
| C    | 0.34410000  | -2.47390200 | 3.27225100  |
| H    | 3.44562000  | -1.07318600 | 3.56291300  |
| H    | 1.79145400  | -2.39380400 | 4.87531700  |
| H    | -0.37467800 | -3.06376600 | 3.84928100  |
| C    | 3.12495800  | -0.19257600 | 0.97310800  |
| C    | 3.74306200  | 0.99094400  | -1.05250200 |
| C    | 5.21999000  | 0.62739500  | -0.80985700 |
| H    | 5.40002700  | -0.44785800 | -0.97014900 |
| H    | 5.85264100  | 1.18624600  | -1.51548300 |
| C    | -1.19685100 | -2.50427600 | 1.28713300  |
| C    | -2.70047800 | -2.62033900 | -0.60848000 |
| C    | -3.08956700 | -4.05608700 | -0.20538900 |
| H    | -3.93724000 | -4.39272600 | -0.82070500 |
| H    | -2.25319300 | -4.75464400 | -0.36689600 |

|    |             |             |             |
|----|-------------|-------------|-------------|
| N  | 2.82354300  | 0.15919800  | -0.22420500 |
| N  | -1.45536900 | -2.16789900 | 0.07411400  |
| C  | -3.84201100 | -1.64697800 | -0.25192100 |
| H  | -3.62093400 | -0.62745800 | -0.59318100 |
| H  | -4.77389400 | -1.97059600 | -0.74156400 |
| H  | -4.01767700 | -1.62568500 | 0.83515600  |
| C  | -2.43249600 | -2.57878200 | -2.12184600 |
| H  | -3.32540200 | -2.90468800 | -2.67696000 |
| H  | -2.19290800 | -1.55623400 | -2.44754800 |
| H  | -1.59978800 | -3.24671100 | -2.39348700 |
| C  | 3.48694900  | 2.47035300  | -0.69936200 |
| H  | 4.12421500  | 3.11665600  | -1.32373800 |
| H  | 2.43334100  | 2.71886700  | -0.87997500 |
| H  | 3.72409800  | 2.66847900  | 0.35766900  |
| C  | 3.39489800  | 0.74295500  | -2.52922300 |
| H  | 2.35871500  | 1.05031900  | -2.73102400 |
| H  | 4.05553200  | 1.33929800  | -3.17694600 |
| H  | 3.52731900  | -0.31777800 | -2.79695100 |
| Bi | 0.49995300  | -0.68365700 | -0.86966900 |
| C  | -1.33812800 | 2.87697400  | 1.49473900  |
| C  | -0.36370500 | 2.12669800  | 0.84266100  |
| C  | -0.61052800 | 1.44322500  | -0.36585200 |
| C  | -1.92130200 | 1.56732400  | -0.86352000 |
| C  | -2.91523600 | 2.29486800  | -0.21990400 |
| F  | -1.04749500 | 3.49387100  | 2.64467800  |
| F  | 0.84359800  | 2.00503300  | 1.43738700  |
| F  | 0.50100800  | 1.86552400  | -1.56485400 |
| F  | -2.26781200 | 0.85246500  | -1.96520800 |
| F  | -4.15656100 | 2.31445800  | -0.71913600 |
| H  | -1.88602900 | -3.13587700 | 1.86923800  |
| H  | -3.40834100 | -4.13017800 | 0.84541200  |
| H  | 4.09029000  | 0.07819300  | 1.42564600  |
| H  | 5.56225900  | 0.89187700  | 0.20236500  |
| C  | -2.62852800 | 2.98018800  | 0.96423800  |
| F  | -3.56466900 | 3.71692900  | 1.57581400  |

ts2b

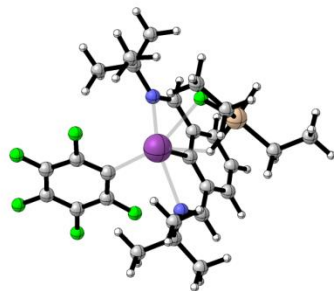

B3LYP electronic energy: -2223.2136499 a.u.  
 B3LYP enthalpy: -2222.615732 a.u.  
 B3LYP free energy: -2222.736847 a.u.  
 B3LYP SCF energy in solution: -2225.48876728 a.u.  
 B3LYP enthalpy in solution: -2224.89084928 a.u.  
 B3LYP free energy in solution: -2225.01196428 a.u.

Cartesian coordinates

| ATOM | X           | Y           | Z           |
|------|-------------|-------------|-------------|
| C    | -0.62465000 | 0.69946800  | 2.65223100  |
| C    | -0.60116400 | -0.32668600 | 1.70625100  |
| C    | -0.82225400 | -1.65453500 | 2.07804600  |
| C    | -1.09196800 | -1.95883500 | 3.42497000  |
| C    | -1.12913500 | -0.93596900 | 4.37746600  |
| C    | -0.89582300 | 0.38932100  | 3.99811400  |
| H    | -1.27208400 | -2.99463300 | 3.72721200  |
| H    | -1.34062100 | -1.17335500 | 5.42235800  |
| H    | -0.92359600 | 1.18556000  | 4.74783500  |
| C    | -0.74913200 | -2.69443900 | 1.04271300  |
| C    | -0.32331100 | -3.43958800 | -1.23188800 |
| C    | -0.91672500 | -4.80246700 | -0.83778200 |
| H    | -1.98153900 | -4.71754100 | -0.56914600 |
| H    | -0.84105500 | -5.49179900 | -1.69158900 |
| C    | -0.36943900 | 2.07923500  | 2.20697200  |
| C    | 0.21736500  | 3.73333400  | 0.52934000  |
| C    | -0.44501300 | 4.79670300  | 1.42179800  |
| H    | -0.29897300 | 5.78956000  | 0.97150600  |
| H    | -1.52835900 | 4.62068600  | 1.51162700  |
| N    | -0.44900300 | -2.41346500 | -0.16880600 |
| N    | -0.02386800 | 2.34677200  | 1.00659800  |
| C    | 1.74317600  | 3.94992600  | 0.49183300  |
| H    | 2.22567900  | 3.22331100  | -0.17494400 |
| H    | 1.96658100  | 4.95936300  | 0.11264000  |
| H    | 2.18237900  | 3.85433900  | 1.49743200  |
| C    | -0.36511800 | 3.82844200  | -0.89202900 |
| H    | -0.25127500 | 4.85183200  | -1.28074500 |

|    |             |             |             |
|----|-------------|-------------|-------------|
| H  | 0.17207000  | 3.15337700  | -1.57633600 |
| H  | -1.42913800 | 3.55429800  | -0.89031300 |
| C  | 1.18212000  | -3.59328900 | -1.52892200 |
| H  | 1.33447700  | -4.32449100 | -2.33790400 |
| H  | 1.62500400  | -2.63614000 | -1.84055200 |
| H  | 1.72296900  | -3.94021800 | -0.63538400 |
| C  | -1.05564400 | -2.90926400 | -2.47738700 |
| H  | -0.61936500 | -1.95873400 | -2.82250900 |
| H  | -0.96957600 | -3.63273000 | -3.30244500 |
| H  | -2.12177400 | -2.73753100 | -2.26853400 |
| C  | 4.25472100  | -1.11430000 | 0.55176900  |
| C  | 2.85841000  | -1.03330200 | 0.55907300  |
| C  | 2.14840500  | -0.15403600 | -0.24997500 |
| C  | 2.91189000  | 0.64212500  | -1.09217900 |
| C  | 4.30737700  | 0.61207900  | -1.14009500 |
| F  | 4.90287300  | -1.97305000 | 1.34142600  |
| F  | 2.21949900  | -1.87444400 | 1.39736200  |
| F  | 2.29703400  | 1.52878400  | -1.91747100 |
| F  | 4.99613000  | 1.41226800  | -1.95496000 |
| H  | -0.95960600 | -3.72530600 | 1.36242700  |
| H  | -0.49239700 | 2.86857300  | 2.96359100  |
| H  | -0.37660500 | -5.26794600 | 0.00124100  |
| H  | -0.00621500 | 4.83543200  | 2.43120900  |
| C  | 4.98129000  | -0.28320500 | -0.30574300 |
| F  | 6.31045200  | -0.34459500 | -0.32609800 |
| Bi | -0.29619000 | 0.17578600  | -0.45883200 |
| F  | -2.50009600 | 1.56776200  | -0.18364600 |
| Si | -3.83209800 | 0.38851100  | -0.50680600 |
| H  | -2.50925300 | -0.56765200 | -0.65857300 |
| H  | -4.70537900 | 1.38804200  | 0.24555000  |
| C  | -4.74362800 | -1.19157800 | 0.17510600  |
| C  | -6.26051300 | -1.05137500 | 0.33204300  |
| H  | -4.28692100 | -1.43075700 | 1.15554300  |
| H  | -4.49136200 | -2.04627700 | -0.48171200 |
| H  | -6.72522000 | -1.94352400 | 0.78935200  |
| H  | -6.51659200 | -0.18476800 | 0.96484200  |
| H  | -6.75714800 | -0.89210700 | -0.64050700 |
| C  | -4.28403700 | 0.60905400  | -2.35106400 |
| C  | -3.66402300 | 1.82686400  | -3.04792800 |
| H  | -5.38623800 | 0.68096300  | -2.39964900 |
| H  | -4.01766500 | -0.31522600 | -2.89612600 |
| H  | -4.00199300 | 1.92481600  | -4.09447300 |
| H  | -3.92564200 | 2.76342200  | -2.52855700 |
| H  | -2.56240000 | 1.77201900  | -3.06653400 |



Ts3b

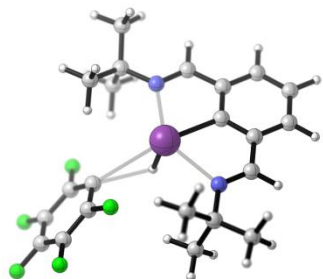

B3LYP electronic energy: -1675.0113139 a.u.  
B3LYP enthalpy: -1674.568580 a.u.  
B3LYP free energy: -1674.665758 a.u.  
B3LYP SCF energy in solution: -1676.83676489 a.u.  
B3LYP enthalpy in solution: -1676.39403089 a.u.  
B3LYP free energy in solution: -1676.49120889 a.u.

Cartesian coordinates

| ATOM | X           | Y           | Z           |
|------|-------------|-------------|-------------|
| C    | 3.31835200  | -1.54028600 | 0.62506100  |
| C    | 2.82530500  | -0.24288000 | 0.44057800  |
| C    | 3.56627800  | 0.86560400  | 0.86781900  |
| C    | 4.81981800  | 0.67127100  | 1.47813600  |
| C    | 5.31754600  | -0.62448600 | 1.65614700  |
| C    | 4.57326700  | -1.73113900 | 1.23358000  |
| H    | 5.40574300  | 1.53142200  | 1.81638700  |
| H    | 6.29006400  | -0.77253800 | 2.13074000  |
| H    | 4.96620000  | -2.74186100 | 1.38013600  |
| C    | 2.98645300  | 2.20088300  | 0.66874100  |
| C    | 1.19839200  | 3.68684900  | -0.06012400 |
| C    | 2.47600000  | -2.65584000 | 0.17712400  |
| N    | 1.82825800  | 2.35703400  | 0.13994900  |
| N    | 1.31760500  | -2.45485100 | -0.33723300 |
| C    | -0.35950900 | -4.01896900 | 0.51784200  |
| H    | -0.96017900 | -3.19496300 | 0.92789100  |
| H    | -1.05264900 | -4.83301700 | 0.25468300  |
| H    | 0.32696400  | -4.39041800 | 1.29593200  |
| C    | -0.55667200 | -3.03928700 | -1.79203200 |
| H    | -1.23513100 | -3.84116300 | -2.12041700 |
| H    | -1.17634300 | -2.23015000 | -1.37115300 |
| H    | -0.01780500 | -2.66643700 | -2.67858700 |
| C    | 0.74634600  | 3.75776800  | -1.53173300 |
| H    | 0.27832600  | 4.73336100  | -1.73360800 |
| H    | 1.60263800  | 3.63992100  | -2.21468900 |

|    |             |             |             |
|----|-------------|-------------|-------------|
| H  | 0.00017100  | 2.98185300  | -1.75572800 |
| C  | 2.14246700  | 4.86115500  | 0.24464300  |
| H  | 3.04629500  | 4.83872600  | -0.38551700 |
| H  | 1.61910700  | 5.80614600  | 0.03909400  |
| H  | 2.45151500  | 4.88531100  | 1.30159800  |
| Bi | 0.81996000  | 0.04216000  | -0.55705700 |
| C  | -4.10020400 | 1.29583000  | -0.19548500 |
| C  | -2.81170200 | 0.76458300  | -0.26599300 |
| C  | -2.42211800 | -0.45279100 | 0.23795500  |
| C  | -3.42582300 | -1.16882600 | 0.86198800  |
| C  | -4.74591300 | -0.72097100 | 0.97608500  |
| F  | -4.42060100 | 2.49652200  | -0.70427200 |
| F  | -1.86903200 | 1.57808900  | -0.89565500 |
| F  | -3.16766400 | -2.39415000 | 1.40783800  |
| F  | -5.69817000 | -1.44592000 | 1.58258300  |
| H  | -0.29203600 | -0.11867400 | 0.85956400  |
| H  | 2.87281400  | -3.67357700 | 0.31104900  |
| C  | 0.42054900  | -3.57887600 | -0.73660900 |
| C  | 1.21389200  | -4.76195000 | -1.32138800 |
| H  | 1.84801900  | -4.44162100 | -2.16373500 |
| H  | 1.85016300  | -5.26039300 | -0.57367100 |
| H  | 0.51060000  | -5.52004100 | -1.69631400 |
| H  | 3.58856200  | 3.05936700  | 1.00116600  |
| C  | -0.03111500 | 3.75039900  | 0.86783500  |
| H  | -0.75405500 | 2.96275800  | 0.61702500  |
| H  | 0.26698000  | 3.64418100  | 1.92253200  |
| H  | -0.53764500 | 4.72063900  | 0.74817800  |
| C  | -5.08001700 | 0.52853300  | 0.44097300  |
| F  | -6.33404400 | 0.98625400  | 0.53809400  |

ts1c

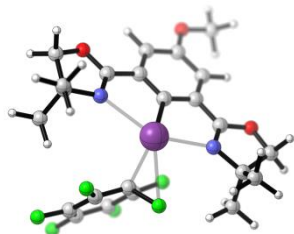

|                                |                     |
|--------------------------------|---------------------|
| B3LYP electronic energy:       | -2036.5768765 a.u.  |
| B3LYP enthalpy:                | -2036.134326 a.u.   |
| B3LYP free energy:             | -2036.235690 a.u.   |
| B3LYP SCF energy in solution:  | -2038.83424074 a.u. |
| B3LYP enthalpy in solution:    | -2038.39169074 a.u. |
| B3LYP free energy in solution: | -2038.49305474 a.u. |

## Cartesian coordinates

| ATOM | X           | Y           | Z           |
|------|-------------|-------------|-------------|
| C    | -1.09758100 | 2.30859300  | 0.28875500  |
| C    | -1.38547900 | 0.97856200  | -0.06049900 |
| C    | -2.60658100 | 0.43084000  | 0.34714400  |
| C    | -3.52873900 | 1.17338800  | 1.10564900  |
| C    | -3.21648300 | 2.49551900  | 1.46018700  |
| C    | -1.99821700 | 3.06611800  | 1.04301100  |
| H    | -4.46761700 | 0.70802400  | 1.40395700  |
| H    | -1.77899200 | 4.09858100  | 1.31976100  |
| C    | -2.84541600 | -0.94707600 | -0.08019200 |
| C    | -2.49563700 | -3.00568700 | -0.93059900 |
| C    | -3.97561500 | -2.82569900 | -0.48163400 |
| H    | -4.67063600 | -2.72960500 | -1.33291700 |
| H    | -4.33045900 | -3.61656600 | 0.19247000  |
| C    | 0.17759000  | 2.83565000  | -0.20440400 |
| C    | 2.20634100  | 2.96295500  | -1.17506900 |
| C    | 1.71964200  | 4.36961400  | -0.70813400 |
| H    | 2.43187000  | 4.88340900  | -0.04782600 |
| H    | 1.46173400  | 5.03376500  | -1.54945800 |
| N    | -1.99026700 | -1.61744000 | -0.77624500 |
| N    | 1.01094800  | 2.13014300  | -0.89230100 |
| O    | -3.98672800 | -1.57243900 | 0.24189600  |
| O    | 0.51184400  | 4.11093300  | 0.03999100  |
| C    | 3.39453100  | 2.47524300  | -0.33228200 |
| H    | 3.66519800  | 1.44444700  | -0.59444300 |
| H    | 4.27173200  | 3.11879100  | -0.50857400 |
| H    | 3.15436000  | 2.50731300  | 0.74171000  |
| C    | 2.54362500  | 2.92728000  | -2.66823400 |
| H    | 3.37993100  | 3.60866500  | -2.89293400 |
| H    | 2.84694200  | 1.91216900  | -2.96619200 |
| H    | 1.67705300  | 3.22614800  | -3.27800800 |
| C    | -1.73294800 | -3.94393400 | 0.01823200  |
| H    | -2.11566400 | -4.97242800 | -0.08741100 |
| H    | -0.66003800 | -3.92123100 | -0.21143900 |
| H    | -1.85655100 | -3.62681900 | 1.06430700  |
| C    | -2.36978600 | -3.46854600 | -2.38296700 |
| H    | -1.30770500 | -3.54643300 | -2.66039900 |
| H    | -2.82648100 | -4.46268900 | -2.51380400 |
| H    | -2.86302600 | -2.76468100 | -3.07137900 |
| Bi   | 0.02890400  | -0.23506400 | -1.34252600 |
| C    | 1.96698700  | -1.53263700 | 2.67495000  |
| C    | 1.07556000  | -1.58394900 | 1.60815500  |

|   |             |             |             |
|---|-------------|-------------|-------------|
| C | 1.47622700  | -1.40010100 | 0.26515900  |
| C | 2.85068400  | -1.12548500 | 0.09314200  |
| C | 3.75410000  | -1.05462400 | 1.14517000  |
| F | 1.52179700  | -1.70693600 | 3.92454600  |
| F | -0.24177200 | -1.72971900 | 1.88795600  |
| F | 1.01150900  | -2.62023300 | -0.71406000 |
| F | 3.28574800  | -0.78745200 | -1.15230200 |
| F | 5.03332700  | -0.73911800 | 0.90558600  |
| C | 3.32626500  | -1.28043800 | 2.45733800  |
| F | 4.19686100  | -1.26904400 | 3.47727900  |
| O | -4.02319100 | 3.30070900  | 2.19264800  |
| C | -5.25270700 | 2.79926900  | 2.67067800  |
| H | -5.71851300 | 3.61125400  | 3.24444800  |
| H | -5.92831100 | 2.51143800  | 1.84503400  |
| H | -5.10940000 | 1.92756300  | 3.33392400  |

ts2c

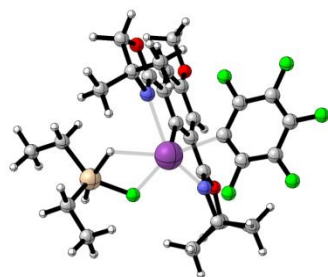

B3LYP electronic energy: -2485.5935451 a.u.  
 B3LYP enthalpy: -2484.992734 a.u.  
 B3LYP free energy: -2485.117905 a.u.  
 B3LYP SCF energy in solution: -2488.1738598 a.u.  
 B3LYP enthalpy in solution: -2487.5730488 a.u.  
 B3LYP free energy in solution: -2487.6982198 a.u.

Cartesian coordinates

| ATOM | X          | Y          | Z           |
|------|------------|------------|-------------|
| C    | 0.74547100 | 0.06304600 | 2.36640900  |
| C    | 0.68531500 | 0.65382200 | 1.10002600  |
| C    | 1.05893000 | 1.98584400 | 0.94692700  |
| C    | 1.51544500 | 2.74117300 | 2.04149100  |
| C    | 1.58781300 | 2.13561900 | 3.30665200  |
| C    | 1.19818500 | 0.79103400 | 3.46936800  |
| H    | 1.80208300 | 3.78050100 | 1.88697400  |
| H    | 1.25605900 | 0.34204200 | 4.46202500  |
| C    | 0.92493500 | 2.53580200 | -0.40723600 |

|    |             |             |             |
|----|-------------|-------------|-------------|
| C  | 0.40702000  | 2.73078000  | -2.59168500 |
| C  | 1.11742800  | 4.01975600  | -2.06629900 |
| H  | 2.12075100  | 4.15964900  | -2.49813000 |
| H  | 0.52807800  | 4.93590400  | -2.21276500 |
| C  | 0.29979600  | -1.33633900 | 2.44312000  |
| C  | -0.55474500 | -3.34082400 | 1.86542500  |
| C  | 0.06906400  | -3.38625300 | 3.29824800  |
| H  | -0.64429300 | -3.69326300 | 4.07645900  |
| H  | 0.96532700  | -4.02269900 | 3.35360100  |
| N  | 0.46910600  | 1.85566400  | -1.40053500 |
| N  | -0.25817400 | -1.94705400 | 1.45866200  |
| O  | 1.27273300  | 3.80543400  | -0.64541200 |
| O  | 0.47792700  | -2.02609200 | 3.57333300  |
| C  | -2.07485700 | -3.55487700 | 1.89448500  |
| H  | -2.50256200 | -3.39403600 | 0.89499200  |
| H  | -2.31038900 | -4.58344800 | 2.21236900  |
| H  | -2.56030400 | -2.85627400 | 2.59409400  |
| C  | 0.12994500  | -4.32802300 | 0.91330500  |
| H  | 0.02519300  | -5.35795400 | 1.29159900  |
| H  | -0.33710000 | -4.28680600 | -0.08287100 |
| H  | 1.19394000  | -4.07905700 | 0.79861700  |
| C  | -1.06355400 | 2.99842200  | -2.94575900 |
| H  | -1.13413300 | 3.68494300  | -3.80487500 |
| H  | -1.57297000 | 2.06029200  | -3.21260800 |
| H  | -1.59617600 | 3.44133500  | -2.09133600 |
| C  | 1.15760300  | 2.09957500  | -3.76847800 |
| H  | 0.66469700  | 1.16846900  | -4.08738200 |
| H  | 1.17084400  | 2.78674500  | -4.62990400 |
| H  | 2.19437300  | 1.85746000  | -3.49193200 |
| Bi | 0.07119800  | -0.57630100 | -0.69144400 |
| C  | -4.22111300 | 1.52271200  | 0.06285900  |
| C  | -2.84189200 | 1.30846600  | -0.03027400 |
| C  | -2.29090000 | 0.09897200  | -0.43432500 |
| C  | -3.19825700 | -0.90201400 | -0.75175200 |
| C  | -4.58429400 | -0.75283000 | -0.66935500 |
| F  | -4.71504300 | 2.70130000  | 0.44862800  |
| F  | -2.05687100 | 2.35886800  | 0.29160400  |
| F  | 2.14796200  | -2.07257800 | -0.07623500 |
| F  | -2.74104100 | -2.11540000 | -1.15779500 |
| F  | -5.41530100 | -1.75129400 | -0.97259200 |
| Si | 3.52314600  | -1.35839500 | -1.00189000 |
| H  | 2.31721500  | -0.30917700 | -1.36777100 |
| H  | 4.39583500  | -2.18488800 | -0.05877400 |
| C  | 4.71745000  | 0.17667600  | -1.05365200 |

|   |             |             |             |
|---|-------------|-------------|-------------|
| C | 6.21161600  | -0.15610000 | -1.01926300 |
| H | 4.45608100  | 0.81938400  | -0.19012200 |
| H | 4.46574700  | 0.77576000  | -1.95007100 |
| H | 6.84818000  | 0.74654100  | -0.98530100 |
| H | 6.46206500  | -0.77035500 | -0.13799600 |
| H | 6.51948400  | -0.73492600 | -1.90710400 |
| C | 3.61266300  | -2.29129300 | -2.66925300 |
| C | 2.72741400  | -3.53985900 | -2.77773100 |
| H | 4.66993600  | -2.57922000 | -2.81664400 |
| H | 3.37245400  | -1.58661300 | -3.48653100 |
| H | 2.85748300  | -4.06083700 | -3.74258800 |
| H | 2.95442700  | -4.26547800 | -1.97932300 |
| H | 1.65594700  | -3.29232200 | -2.68626100 |
| C | -5.09558600 | 0.48080500  | -0.25822000 |
| F | -6.41120400 | 0.66382400  | -0.17264400 |
| O | 2.01272400  | 2.76272700  | 4.42665700  |
| C | 2.43070200  | 4.10992900  | 4.35336000  |
| H | 2.73395100  | 4.39675200  | 5.36869300  |
| H | 3.29165300  | 4.23424900  | 3.67279700  |
| H | 1.61299200  | 4.77444800  | 4.02184300  |

ts3c

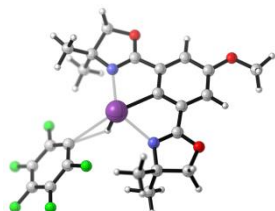

|                                |                     |
|--------------------------------|---------------------|
| B3LYP electronic energy:       | -1937.3893229 a.u.  |
| B3LYP enthalpy:                | -1936.943773 a.u.   |
| B3LYP free energy:             | -1937.046507 a.u.   |
| B3LYP SCF energy in solution:  | -1939.51936885 a.u. |
| B3LYP enthalpy in solution:    | -1939.07381885 a.u. |
| B3LYP free energy in solution: | -1939.17655285 a.u. |

Cartesian coordinates

| ATOM | X           | Y           | Z           |
|------|-------------|-------------|-------------|
| C    | -2.95880700 | -1.37281800 | -0.16391900 |
| C    | -2.32933600 | -0.12821800 | -0.01485600 |
| C    | -3.05428800 | 1.03103000  | -0.29735100 |
| C    | -4.39670000 | 0.97095800  | -0.71612200 |
| C    | -5.01524600 | -0.28328400 | -0.84998300 |
| C    | -4.29206400 | -1.46146800 | -0.57454000 |

|    |             |             |             |
|----|-------------|-------------|-------------|
| H  | -4.93030000 | 1.89606800  | -0.93186100 |
| H  | -4.79120100 | -2.42468600 | -0.69354200 |
| C  | -2.31026100 | 2.28693900  | -0.14474200 |
| C  | -0.60939300 | 3.73549300  | 0.18775900  |
| C  | -2.10706000 | -2.53569900 | 0.11465300  |
| N  | -1.07252200 | 2.32841800  | 0.21723300  |
| N  | -0.86661200 | -2.42373500 | 0.45384400  |
| C  | 0.64510000  | -3.99524900 | -0.68857600 |
| H  | 1.48016100  | -3.27973500 | -0.69643600 |
| H  | 1.06765900  | -5.01301500 | -0.66560800 |
| H  | 0.08069100  | -3.87880000 | -1.62738600 |
| C  | 0.50010300  | -3.96912100 | 1.83552900  |
| H  | 0.87242900  | -5.00285200 | 1.91634500  |
| H  | 1.36979200  | -3.29545600 | 1.86712200  |
| H  | -0.13897800 | -3.75995300 | 2.70752600  |
| C  | 0.03484400  | 4.11853500  | 1.52407200  |
| H  | 0.30622700  | 5.18651000  | 1.52765900  |
| H  | -0.65315400 | 3.93184400  | 2.36331800  |
| H  | 0.95302300  | 3.53404200  | 1.68244500  |
| C  | -1.95102500 | 4.49305800  | -0.06673900 |
| H  | -2.32086000 | 5.01774000  | 0.82870600  |
| H  | -1.90358600 | 5.20050800  | -0.90641400 |
| C  | -0.26947700 | -3.78039500 | 0.52627400  |
| C  | -1.54746300 | -4.67026300 | 0.45033000  |
| H  | -1.84848600 | -5.06992600 | 1.43250800  |
| H  | -1.46631600 | -5.49625500 | -0.26911500 |
| C  | 0.38572100  | 3.91901900  | -0.96804800 |
| H  | -0.07068100 | 3.63899000  | -1.93038900 |
| H  | 0.70850000  | 4.97097500  | -1.02917900 |
| H  | 1.27319400  | 3.29272900  | -0.80232600 |
| O  | -2.90731000 | 3.45918700  | -0.40071800 |
| O  | -2.59321600 | -3.77657700 | -0.00216900 |
| Bi | -0.16703100 | -0.00975000 | 0.71175600  |
| C  | 4.63825100  | 1.33902100  | -0.08148300 |
| C  | 3.34050200  | 0.84105900  | 0.04067100  |
| C  | 2.93342600  | -0.41868400 | -0.32961400 |
| C  | 3.92681600  | -1.21791500 | -0.86141700 |
| C  | 5.25423700  | -0.80601300 | -1.01821100 |
| F  | 4.97674100  | 2.58234800  | 0.29578900  |
| F  | 2.41130200  | 1.72974300  | 0.58132800  |
| F  | 3.65228900  | -2.49381300 | -1.26289200 |
| F  | 6.19701300  | -1.60975200 | -1.53265400 |
| H  | 0.89709800  | -0.19728600 | -0.75627500 |
| C  | 5.60698400  | 0.48997200  | -0.62424500 |

|   |             |             |             |
|---|-------------|-------------|-------------|
| F | 6.86849100  | 0.91355200  | -0.76532600 |
| O | -6.29959400 | -0.46147600 | -1.24177000 |
| C | -7.09575900 | 0.66409000  | -1.54445900 |
| H | -8.08274600 | 0.27904800  | -1.83247500 |
| H | -7.21202900 | 1.33099300  | -0.67136700 |
| H | -6.67914300 | 1.24691600  | -2.38541500 |

The following are the details of the calculation data for each species in Table 1:

Ts1-2a-1

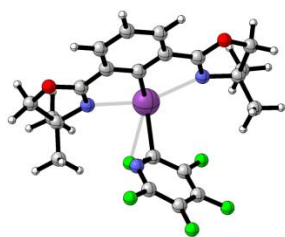

|                                |                     |
|--------------------------------|---------------------|
| B3LYP electronic energy:       | -1839.0293997 a.u.  |
| B3LYP enthalpy:                | -1838.625969 a.u.   |
| B3LYP free energy:             | -1838.719229 a.u.   |
| B3LYP SCF energy in solution:  | -1841.04365602 a.u. |
| B3LYP enthalpy in solution:    | -1840.64022502 a.u. |
| B3LYP free energy in solution: | -1840.73348502 a.u. |

Cartesian coordinates

| ATOM | X           | Y           | Z           |
|------|-------------|-------------|-------------|
| C    | 0.57584000  | 2.39238400  | 1.40103000  |
| C    | -0.48287600 | 1.70462900  | 0.79114900  |
| C    | -1.76524600 | 1.79054800  | 1.35107800  |
| C    | -1.99446400 | 2.54971600  | 2.51009000  |
| C    | -0.92770000 | 3.22724400  | 3.10946200  |
| C    | 0.35714000  | 3.15651700  | 2.55932000  |
| H    | -2.99938400 | 2.60521000  | 2.93442100  |
| H    | -1.09843000 | 3.81663300  | 4.01295800  |
| H    | 1.19055200  | 3.68759100  | 3.02442300  |
| C    | -2.80920600 | 1.05598100  | 0.63512700  |
| C    | -3.82116000 | -0.32691500 | -0.83493800 |
| C    | -4.86406000 | 0.42494100  | 0.04436800  |
| H    | -5.41636200 | 1.20062400  | -0.51238700 |
| H    | -5.57745300 | -0.24327200 | 0.54460000  |
| C    | 1.88598900  | 2.25793900  | 0.75851100  |
| C    | 3.54647900  | 1.55924700  | -0.58645600 |
| C    | 4.01843900  | 2.73974500  | 0.31359100  |
| H    | 4.93378200  | 2.52400000  | 0.88155900  |



|    |             |             |             |
|----|-------------|-------------|-------------|
| H  | 4.15340300  | 3.67788900  | -0.25022500 |
| N  | -2.56928700 | 0.36545400  | -0.42862100 |
| N  | 2.09616300  | 1.51510300  | -0.27426400 |
| O  | -4.07642200 | 1.08972600  | 1.06125200  |
| O  | 2.93656700  | 2.93518500  | 1.24971700  |
| C  | 4.20272200  | 0.23706800  | -0.15750800 |
| H  | 3.75785300  | -0.61150700 | -0.69322000 |
| H  | 5.28327100  | 0.26132700  | -0.37331400 |
| H  | 4.07170300  | 0.06812300  | 0.92288000  |
| C  | 3.77133900  | 1.82925700  | -2.07581100 |
| H  | 4.84620600  | 1.93496900  | -2.29406900 |
| H  | 3.38566100  | 0.99227100  | -2.67744900 |
| H  | 3.25917200  | 2.75054700  | -2.39367100 |
| C  | -3.74444600 | -1.81470100 | -0.46076200 |
| H  | -4.69153700 | -2.31188800 | -0.72847700 |
| H  | -2.90772600 | -2.29110700 | -0.98621500 |
| H  | -3.56797000 | -1.93818200 | 0.61820500  |
| C  | -4.07326900 | -0.14830700 | -2.33317000 |
| H  | -3.29151400 | -0.66803300 | -2.90716900 |
| H  | -5.04521100 | -0.58413600 | -2.61477900 |
| H  | -4.07262100 | 0.91598200  | -2.61642900 |
| Bi | -0.19024100 | 0.49141400  | -1.11186300 |
| C  | 0.09458900  | -1.72949500 | -0.22641700 |
| C  | 1.36078200  | -2.31636800 | -0.49412100 |
| C  | 1.88748800  | -3.24720700 | 0.37531600  |
| F  | -0.85937000 | -1.99623000 | -1.58850300 |
| F  | 2.08256800  | -1.88810900 | -1.55715200 |
| F  | 3.09362900  | -3.77404000 | 0.16335700  |
| C  | 1.14374500  | -3.63487700 | 1.50893200  |
| F  | 1.62327100  | -4.55346300 | 2.36078600  |
| N  | -0.56046500 | -2.07750000 | 0.88581400  |
| C  | -0.07631900 | -2.99446700 | 1.69274500  |
| F  | -0.80501600 | -3.30731400 | 2.76990400  |

ts2-2a-1

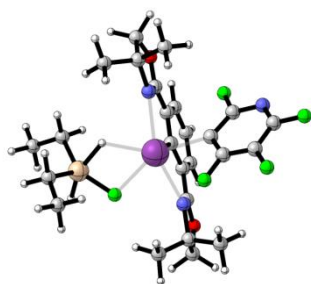

B3LYP electronic energy: -2288.0486981 a.u.  
 B3LYP enthalpy: -2287.487095 a.u.  
 B3LYP free energy: -2287.605005 a.u.  
 B3LYP SCF energy in solution: -2290.38505786 a.u.  
 B3LYP enthalpy in solution: -2289.82345486 a.u.  
 B3LYP free energy in solution: -2289.94136486 a.u.

Cartesian coordinates

| ATOM | X           | Y           | Z           |
|------|-------------|-------------|-------------|
| C    | 0.46673000  | -0.89707000 | 2.47152900  |
| C    | 0.52189300  | 0.18993300  | 1.59770700  |
| C    | 0.87931600  | 1.45442400  | 2.06868700  |
| C    | 1.20683700  | 1.63526200  | 3.42236300  |
| C    | 1.16671700  | 0.53948300  | 4.29082400  |
| C    | 0.79712000  | -0.72726200 | 3.82617100  |
| H    | 1.48927700  | 2.62528000  | 3.78608200  |
| H    | 1.42424100  | 0.67473000  | 5.34350300  |
| H    | 0.76115600  | -1.58147800 | 4.50547300  |
| C    | 0.87107800  | 2.53484700  | 1.07624300  |
| C    | 0.58405700  | 3.65791200  | -0.85674700 |
| C    | 1.20716800  | 4.57902400  | 0.24131400  |
| H    | 2.24592500  | 4.86723200  | 0.01696400  |
| H    | 0.61488500  | 5.48261900  | 0.44302400  |
| C    | 0.04639800  | -2.17642100 | 1.88367500  |
| C    | -0.71061900 | -3.70773500 | 0.41324100  |
| C    | -0.19915000 | -4.38981100 | 1.72350100  |
| H    | -0.95904700 | -5.00965900 | 2.22043200  |
| H    | 0.71221500  | -4.98644500 | 1.56538700  |
| N    | 0.53127900  | 2.35693800  | -0.15288500 |
| N    | -0.40873100 | -2.28235500 | 0.68553500  |
| O    | 1.22085400  | 3.77196600  | 1.44026800  |
| O    | 0.13910600  | -3.29584100 | 2.60751400  |
| C    | -2.22472300 | -3.88466700 | 0.23038500  |
| H    | -2.57982600 | -3.28819600 | -0.62167500 |
| H    | -2.46648400 | -4.94243400 | 0.03800100  |
| H    | -2.77269200 | -3.56193100 | 1.12967700  |
| C    | 0.06274000  | -4.18994400 | -0.81917800 |
| H    | -0.04221100 | -5.28116700 | -0.93310900 |
| H    | -0.33419200 | -3.71846300 | -1.73171100 |
| H    | 1.12571000  | -3.92485600 | -0.73392600 |
| C    | -0.84250400 | 4.09550500  | -1.22057200 |
| H    | -0.82934800 | 5.08090800  | -1.71366700 |
| H    | -1.30382400 | 3.37309600  | -1.91083500 |
| H    | -1.47411600 | 4.15764400  | -0.32209400 |

|    |             |             |             |
|----|-------------|-------------|-------------|
| C  | 1.47440200  | 3.56556800  | -2.10003100 |
| H  | 1.03729700  | 2.87942900  | -2.84162400 |
| H  | 1.57537700  | 4.55489600  | -2.57489400 |
| H  | 2.47625600  | 3.19243700  | -1.84116200 |
| Bi | 0.11421500  | -0.12396300 | -0.60845600 |
| C  | -2.89634300 | 1.37599300  | 0.52939900  |
| C  | -2.26214700 | 0.44415100  | -0.29362800 |
| C  | -3.15713600 | -0.27285900 | -1.07670200 |
| C  | -4.54150400 | -0.08259000 | -1.02671500 |
| F  | -2.14861100 | 2.15153900  | 1.33470200  |
| F  | 2.15165700  | -1.78467900 | -0.46471200 |
| F  | -2.70013500 | -1.21282000 | -1.93052400 |
| F  | -5.37941500 | -0.79154100 | -1.78255600 |
| Si | 3.60714600  | -0.76461700 | -0.80346700 |
| H  | 2.41315500  | 0.35384900  | -0.86180900 |
| H  | 4.37829400  | -1.91683400 | -0.16287400 |
| C  | 4.72970700  | 0.63964900  | -0.05770300 |
| C  | 6.21960200  | 0.30183300  | 0.04621000  |
| H  | 4.32782800  | 0.87495900  | 0.94738200  |
| H  | 4.57304600  | 1.55730700  | -0.65714000 |
| H  | 6.80439700  | 1.10219800  | 0.53447500  |
| H  | 6.37798000  | -0.62326500 | 0.62575300  |
| H  | 6.66909200  | 0.13427700  | -0.94780200 |
| C  | 3.96272400  | -0.92511000 | -2.67533400 |
| C  | 3.15744400  | -2.00029100 | -3.41635200 |
| H  | 5.04199900  | -1.14315600 | -2.77430000 |
| H  | 3.80678100  | 0.05976400  | -3.15274600 |
| H  | 3.44452700  | -2.07716300 | -4.47978900 |
| H  | 3.30194400  | -2.99536600 | -2.96409600 |
| H  | 2.07394700  | -1.79323300 | -3.38832600 |
| N  | -4.19406100 | 1.60667500  | 0.61651500  |
| C  | -4.99618600 | 0.89500600  | -0.13957400 |
| F  | -6.30286600 | 1.12192800  | -0.05145500 |

ts3-2a-1

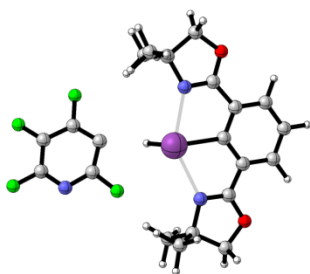

B3LYP electronic energy: -1739.8451779 a.u.

B3LYP enthalpy: -1739.438744 a.u.  
 B3LYP free energy: -1739.532721 a.u.  
 B3LYP SCF energy in solution: -1741.7298091 a.u.  
 B3LYP enthalpy in solution: -1741.3233751 a.u.  
 B3LYP free energy in solution: -1741.4173531 a.u.

Cartesian coordinates

| ATOM | X           | Y           | Z           |
|------|-------------|-------------|-------------|
| C    | 3.02084700  | 1.58937600  | -0.44568100 |
| C    | 2.53320700  | 0.28926100  | -0.26002700 |
| C    | 3.35025800  | -0.80471800 | -0.57510800 |
| C    | 4.65133700  | -0.60443900 | -1.06603200 |
| C    | 5.12892300  | 0.70040400  | -1.23773000 |
| C    | 4.32160200  | 1.80225900  | -0.93230200 |
| H    | 5.28062800  | -1.46289400 | -1.31189900 |
| H    | 6.14018000  | 0.86011600  | -1.61822900 |
| H    | 4.69329500  | 2.81983900  | -1.07300400 |
| C    | 2.74063500  | -2.12448500 | -0.37298500 |
| C    | 1.20714200  | -3.72371600 | 0.06124500  |
| C    | 2.07376100  | 2.66171100  | -0.12275700 |
| N    | 1.53765800  | -2.27931400 | 0.06614400  |
| N    | 0.87148600  | 2.43040700  | 0.28622100  |
| C    | -0.84202200 | 3.82788500  | -0.79204000 |
| H    | -1.59469900 | 3.02721100  | -0.75200100 |
| H    | -1.36856400 | 4.79541900  | -0.75453600 |
| H    | -0.31283400 | 3.76073000  | -1.75586200 |
| C    | -0.57969800 | 3.84568900  | 1.72200900  |
| H    | -1.04839300 | 4.83846000  | 1.81464700  |
| H    | -1.37577400 | 3.08948700  | 1.79579600  |
| H    | 0.11545000  | 3.70874100  | 2.56494400  |
| C    | 0.66921700  | -4.15933000 | 1.42783400  |
| H    | 0.50196100  | -5.24831100 | 1.44565100  |
| H    | 1.37664100  | -3.90314500 | 2.23181500  |
| H    | -0.29221000 | -3.66516400 | 1.63178300  |
| C    | 2.59889800  | -4.35264100 | -0.26210100 |
| H    | 3.06861000  | -4.82246000 | 0.61693600  |
| H    | 2.57362300  | -5.07612200 | -1.08881700 |
| C    | 0.14500500  | 3.72092000  | 0.37990700  |
| C    | 1.32225000  | 4.73221900  | 0.23865700  |
| H    | 1.63388300  | 5.16072000  | 1.20531200  |
| H    | 1.12272700  | 5.54539600  | -0.47230100 |
| C    | 0.17643300  | -4.00262200 | -1.04325100 |
| H    | 0.55944500  | -3.69266600 | -2.02823100 |
| H    | -0.05725200 | -5.07875100 | -1.08416300 |

|    |             |             |             |
|----|-------------|-------------|-------------|
| H  | -0.75306500 | -3.45363700 | -0.83746400 |
| O  | 3.42861300  | -3.23650200 | -0.66369000 |
| O  | 2.42538000  | 3.94479300  | -0.27182900 |
| Bi | 0.43112100  | -0.03448400 | 0.59632900  |
| C  | -3.01508400 | -1.14715200 | 0.17346700  |
| C  | -2.72351600 | 0.15522400  | -0.19633600 |
| C  | -3.86155400 | 0.81026600  | -0.63347000 |
| C  | -5.12731300 | 0.20924900  | -0.67727300 |
| F  | -1.96169500 | -1.93163700 | 0.62390600  |
| F  | -3.80568500 | 2.10194500  | -1.04198000 |
| F  | -6.21878600 | 0.86109800  | -1.09920800 |
| H  | -0.73553700 | 0.06448500  | -0.80062700 |
| C  | -5.20453100 | -1.12000500 | -0.25488200 |
| N  | -4.16362900 | -1.80075400 | 0.16902400  |
| F  | -6.38899800 | -1.73763700 | -0.28021800 |

ts1-2a-2

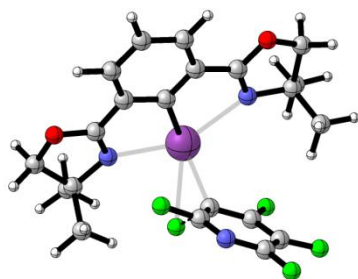

B3LYP electronic energy: -1839.034267 a.u.  
 B3LYP enthalpy: -1838.630996 a.u.  
 B3LYP free energy: -1838.723337 a.u.  
 B3LYP SCF energy in solution: -1841.0471866 a.u.  
 B3LYP enthalpy in solution: -1840.6439156 a.u.  
 B3LYP free energy in solution: -1840.7362566 a.u.

Cartesian coordinates

| ATOM | X           | Y          | Z          |
|------|-------------|------------|------------|
| C    | 0.08633100  | 2.54512300 | 1.14078700 |
| C    | -0.83895300 | 1.61659500 | 0.64006800 |
| C    | -2.13579700 | 1.58451300 | 1.17634700 |
| C    | -2.50276200 | 2.45606900 | 2.21337100 |
| C    | -1.56505000 | 3.36664200 | 2.71353500 |
| C    | -0.27320000 | 3.42033400 | 2.17932900 |
| H    | -3.51487000 | 2.41810500 | 2.62231900 |
| H    | -1.84496200 | 4.04314300 | 3.52389000 |
| H    | 0.45717100  | 4.13675300 | 2.56172500 |

|    |             |             |             |
|----|-------------|-------------|-------------|
| C  | -3.03884200 | 0.60560400  | 0.57274100  |
| C  | -3.78650500 | -1.12164200 | -0.66910100 |
| C  | -4.95616100 | -0.41468500 | 0.07515000  |
| H  | -5.59201900 | 0.18400600  | -0.59884800 |
| H  | -5.58506000 | -1.10067500 | 0.65777600  |
| C  | 1.40305600  | 2.54630100  | 0.50146700  |
| C  | 3.14907100  | 1.97943700  | -0.80310000 |
| C  | 3.42349000  | 3.31657300  | -0.05123600 |
| H  | 4.36275000  | 3.31725900  | 0.51857200  |
| H  | 3.40383200  | 4.19290100  | -0.72022400 |
| N  | -2.67059700 | -0.18326200 | -0.38012700 |
| N  | 1.73172600  | 1.72733100  | -0.44095400 |
| O  | -4.30553900 | 0.49585900  | 0.99320100  |
| O  | 2.32650000  | 3.44358600  | 0.87928300  |
| C  | 4.03430100  | 0.84556600  | -0.26255100 |
| H  | 3.75718400  | -0.11722900 | -0.71080300 |
| H  | 5.09179100  | 1.04540600  | -0.50012200 |
| H  | 3.93780900  | 0.75902900  | 0.83084300  |
| C  | 3.30077600  | 2.11802300  | -2.31999900 |
| H  | 4.33792300  | 2.38000300  | -2.58415600 |
| H  | 3.05710300  | 1.16602200  | -2.81566500 |
| H  | 2.63253300  | 2.89811700  | -2.71613500 |
| C  | -3.48180100 | -2.49525400 | -0.05096600 |
| H  | -4.31222100 | -3.18988600 | -0.25883500 |
| H  | -2.54847000 | -2.89663800 | -0.46552600 |
| H  | -3.35418700 | -2.41305000 | 1.03851300  |
| C  | -4.02374000 | -1.23317300 | -2.17576100 |
| H  | -3.15487900 | -1.70630400 | -2.65774800 |
| H  | -4.90645300 | -1.85909000 | -2.38286600 |
| H  | -4.18359400 | -0.24291300 | -2.63019200 |
| Bi | -0.30648800 | 0.24281200  | -1.07929900 |
| C  | 0.22847000  | -2.08480300 | 1.38782900  |
| C  | 0.53587500  | -1.77309000 | 0.03914600  |
| C  | 1.85538300  | -2.13652900 | -0.29750500 |
| C  | 2.71809200  | -2.75515600 | 0.60273300  |
| F  | -0.97394400 | -1.68139700 | 1.85879700  |
| F  | -0.52551800 | -2.40358600 | -1.04287600 |
| F  | 2.33626100  | -1.78055200 | -1.51225000 |
| F  | 3.97551200  | -3.03966800 | 0.24649100  |
| N  | 1.02018700  | -2.67376500 | 2.24568800  |
| C  | 2.23378600  | -3.02534500 | 1.88358200  |
| F  | 3.01716800  | -3.64398300 | 2.77672900  |

ts2-2a-2

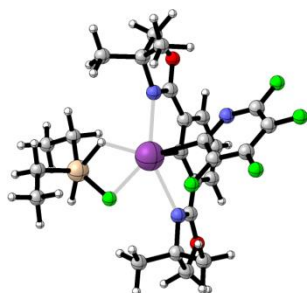

B3LYP electronic energy: -2288.026165 a.u.  
B3LYP enthalpy: -2287.464956 a.u.  
B3LYP free energy: -2287.583805 a.u.  
B3LYP SCF energy in solution: -2290.36416183 a.u.  
B3LYP enthalpy in solution: -2289.80295283 a.u.  
B3LYP free energy in solution: -2289.92180183 a.u.

Cartesian coordinates

| ATOM | X           | Y           | Z           |
|------|-------------|-------------|-------------|
| C    | 0.40974600  | -0.86732800 | 2.43456500  |
| C    | 0.35408000  | 0.21575700  | 1.55591800  |
| C    | 0.37547000  | 1.52231100  | 2.04673900  |
| C    | 0.48770500  | 1.75459300  | 3.42749300  |
| C    | 0.57309400  | 0.66616400  | 4.30170100  |
| C    | 0.53319500  | -0.64545400 | 3.81587200  |
| H    | 0.50851700  | 2.77818000  | 3.80710300  |
| H    | 0.66700200  | 0.84169100  | 5.37557000  |
| H    | 0.59125200  | -1.49478700 | 4.49986500  |
| C    | 0.27189100  | 2.58541900  | 1.04128700  |
| C    | 0.06080800  | 3.63785900  | -0.94283500 |
| C    | 0.23589700  | 4.66587100  | 0.22376800  |
| H    | 1.17013500  | 5.24286800  | 0.14990300  |
| H    | -0.61165700 | 5.35948800  | 0.32180200  |
| C    | 0.31439900  | -2.19834000 | 1.82040000  |
| C    | 0.01214800  | -3.83433100 | 0.30152600  |
| C    | 0.55696900  | -4.40993000 | 1.64787500  |
| H    | -0.08096100 | -5.19373100 | 2.08042000  |
| H    | 1.58904100  | -4.78329400 | 1.56346200  |
| N    | 0.15577800  | 2.35114100  | -0.21963700 |
| N    | -0.00590500 | -2.37961800 | 0.58789400  |
| O    | 0.30177300  | 3.86495200  | 1.42424600  |
| O    | 0.56982000  | -3.28467300 | 2.55643900  |
| C    | -1.41778500 | -4.31440800 | 0.01330600  |
| H    | -1.83510500 | -3.78039800 | -0.85192500 |
| H    | -1.42309300 | -5.39426500 | -0.20659100 |

|    |             |             |             |
|----|-------------|-------------|-------------|
| H  | -2.07736700 | -4.13454000 | 0.87720500  |
| C  | 0.95318000  | -4.13766900 | -0.86937600 |
| H  | 1.08112200  | -5.22636200 | -0.98457800 |
| H  | 0.53443400  | -3.74882600 | -1.81086500 |
| H  | 1.93044800  | -3.66181300 | -0.70823200 |
| C  | -1.32024300 | 3.75975800  | -1.60177500 |
| H  | -1.42226800 | 4.73631700  | -2.10223600 |
| H  | -1.45929500 | 2.97246900  | -2.35839800 |
| H  | -2.11965700 | 3.65635800  | -0.85351800 |
| C  | 1.18472800  | 3.75351900  | -1.97938100 |
| H  | 1.07521400  | 2.98602000  | -2.76060000 |
| H  | 1.15574100  | 4.74108200  | -2.46775400 |
| H  | 2.17048600  | 3.61833100  | -1.51035000 |
| Bi | 0.23936700  | -0.14076900 | -0.67305200 |
| C  | -2.18402600 | 0.10802000  | -0.43821500 |
| C  | -3.01187200 | -0.75564600 | -1.14384900 |
| C  | -4.40588600 | -0.67944900 | -1.03764400 |
| F  | 2.55388300  | -1.44350300 | -0.30145200 |
| F  | -2.48702000 | -1.69961500 | -1.95197700 |
| F  | -5.20085200 | -1.50932200 | -1.70057300 |
| Si | 3.82642900  | -0.18596700 | -0.51174900 |
| H  | 2.47362400  | 0.71739900  | -0.67673100 |
| H  | 4.74446500  | -1.21197000 | 0.15669600  |
| C  | 4.61865900  | 1.35486000  | 0.37627100  |
| C  | 6.13074600  | 1.27670300  | 0.60383200  |
| H  | 4.09858600  | 1.46743500  | 1.34788600  |
| H  | 4.35213100  | 2.25963300  | -0.20357500 |
| H  | 6.52139400  | 2.13900100  | 1.17401100  |
| H  | 6.40241200  | 0.36291000  | 1.15883100  |
| H  | 6.68403400  | 1.24380800  | -0.35075700 |
| C  | 4.37041800  | -0.22075600 | -2.34620700 |
| C  | 3.84999900  | -1.40934000 | -3.16535900 |
| H  | 5.47594100  | -0.23127500 | -2.35000600 |
| H  | 4.07236600  | 0.72873500  | -2.82773200 |
| H  | 4.23253500  | -1.40307500 | -4.20135500 |
| H  | 4.14527700  | -2.37023500 | -2.71211300 |
| H  | 2.74812400  | -1.41396600 | -3.22713900 |
| C  | -4.94466600 | 0.30481900  | -0.21105200 |
| F  | -6.26123500 | 0.43221400  | -0.07106500 |
| N  | -2.74281500 | 1.05222600  | 0.34690500  |
| C  | -4.04213300 | 1.14793500  | 0.45312200  |
| F  | -4.54406800 | 2.10800900  | 1.23173500  |



ts3-2a-2

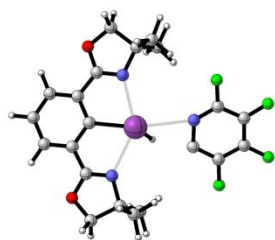

B3LYP electronic energy: -1739.8238404 a.u.  
B3LYP enthalpy: -1739.417667 a.u.  
B3LYP free energy: -1739.511611 a.u.  
B3LYP SCF energy in solution: -1741.70493359 a.u.  
B3LYP enthalpy in solution: -1741.29876059 a.u.  
B3LYP free energy in solution: -1741.39270459 a.u.

Cartesian coordinates

| ATOM | X           | Y           | Z           |
|------|-------------|-------------|-------------|
| C    | -3.33434000 | -0.94326600 | -0.32031600 |
| C    | -2.52030600 | 0.19242300  | -0.18317000 |
| C    | -3.07580300 | 1.45691000  | -0.43050200 |
| C    | -4.42306200 | 1.59127000  | -0.80651700 |
| C    | -5.21977200 | 0.44831700  | -0.93510500 |
| C    | -4.68262400 | -0.82146100 | -0.69572700 |
| H    | -4.83882500 | 2.58306200  | -0.99846100 |
| H    | -6.26735100 | 0.54759800  | -1.22803800 |
| H    | -5.30162300 | -1.71549300 | -0.80099600 |
| C    | -2.15890600 | 2.59250000  | -0.28790600 |
| C    | -0.27182000 | 3.78873200  | 0.01701500  |
| C    | -2.67275800 | -2.22756500 | -0.06882400 |
| N    | -0.92320300 | 2.46018100  | 0.05411900  |
| N    | -1.43621000 | -2.31560800 | 0.27948300  |
| C    | -0.10520100 | -4.05435800 | -0.83528400 |
| H    | 0.80066700  | -3.43028700 | -0.78207500 |
| H    | 0.19314800  | -5.11532200 | -0.81271500 |
| H    | -0.59846900 | -3.85452500 | -1.79973000 |
| C    | -0.39405600 | -4.07589200 | 1.67620600  |
| H    | -0.18048200 | -5.15480700 | 1.74401300  |
| H    | 0.55863600  | -3.53492400 | 1.77774600  |
| H    | -1.04596100 | -3.79578100 | 2.51825300  |
| C    | 0.44376800  | 4.07906100  | 1.34050000  |
| H    | 0.83628900  | 5.10894900  | 1.34657900  |
| H    | -0.24244100 | 3.96407200  | 2.19379600  |
| H    | 1.29415100  | 3.39436200  | 1.47333900  |
| C    | -1.49810200 | 4.72748500  | -0.21467300 |
| H    | -1.77520800 | 5.29639800  | 0.68759200  |

|    |             |             |             |
|----|-------------|-------------|-------------|
| H  | -1.36453000 | 5.42492400  | -1.05372700 |
| C  | -1.05281300 | -3.74330000 | 0.33383900  |
| C  | -2.44197400 | -4.43867100 | 0.16798800  |
| H  | -2.81760300 | -4.87170300 | 1.10930000  |
| H  | -2.45487300 | -5.21009800 | -0.61482900 |
| C  | 0.71769600  | 3.83549400  | -1.15715700 |
| H  | 0.20798700  | 3.62857800  | -2.11115200 |
| H  | 1.18817500  | 4.83012800  | -1.22210300 |
| H  | 1.50965800  | 3.08700300  | -1.01461900 |
| O  | -2.59217300 | 3.83893700  | -0.53412700 |
| O  | -3.34458200 | -3.37920900 | -0.22543200 |
| Bi | -0.32392600 | -0.01658700 | 0.48967400  |
| C  | 2.43510300  | -0.94887400 | -0.50232500 |
| C  | 3.65902300  | -1.54767900 | -0.78029200 |
| C  | 4.87223000  | -0.88612300 | -0.57613600 |
| F  | 3.71143100  | -2.81102200 | -1.25062100 |
| F  | 6.04837100  | -1.45053900 | -0.84904800 |
| H  | 0.48735900  | -0.60401400 | -1.03431200 |
| C  | 4.84154000  | 0.41702800  | -0.06668900 |
| F  | 5.97065100  | 1.09846300  | 0.14321100  |
| C  | 3.58622700  | 0.96153300  | 0.19997900  |
| N  | 2.46405500  | 0.31769300  | -0.01521700 |
| F  | 3.51781200  | 2.21460200  | 0.68729400  |

The following are the details of the calculation data for each species in Table 2:

ts1-2c

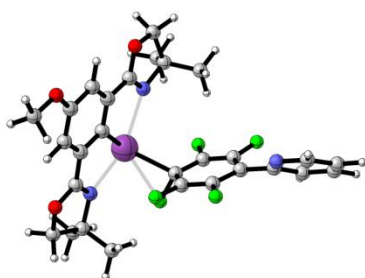

B3LYP electronic energy: -2184.3491198 a.u.  
 B3LYP enthalpy: -2183.825649 a.u.  
 B3LYP free energy: -2183.935346 a.u.  
 B3LYP SCF energy in solution: -2186.77980493 a.u.  
 B3LYP enthalpy in solution: -2186.25633393 a.u.  
 B3LYP free energy in solution: -2186.36603093 a.u.

Cartesian coordinates

| ATOM | X | Y | Z |
|------|---|---|---|
|------|---|---|---|

|    |             |             |             |
|----|-------------|-------------|-------------|
| C  | -1.78832800 | 2.02147000  | 0.99318300  |
| C  | -2.02054900 | 0.72677000  | 0.50280200  |
| C  | -2.86964000 | -0.11851000 | 1.22266000  |
| C  | -3.47108400 | 0.29426200  | 2.42462300  |
| C  | -3.21405200 | 1.58657600  | 2.90977100  |
| C  | -2.37449600 | 2.45529800  | 2.18567400  |
| H  | -4.12339400 | -0.39712800 | 2.95684800  |
| H  | -2.19431400 | 3.45868600  | 2.57460900  |
| C  | -3.08193200 | -1.44051800 | 0.63227800  |
| C  | -2.85230900 | -3.23773000 | -0.70913500 |
| C  | -4.01092500 | -3.44063400 | 0.31090900  |
| H  | -5.00807100 | -3.37700200 | -0.15660200 |
| H  | -3.93418300 | -4.37462300 | 0.88317900  |
| C  | -0.92011900 | 2.86894900  | 0.17034700  |
| C  | 0.48576800  | 3.55412800  | -1.45032500 |
| C  | 0.04082800  | 4.74864100  | -0.55241800 |
| H  | 0.88036600  | 5.31623500  | -0.12833600 |
| H  | -0.64172100 | 5.44201300  | -1.07108600 |
| N  | -2.52254900 | -1.80853700 | -0.47034100 |
| N  | -0.36487000 | 2.45861800  | -0.91970900 |
| O  | -3.88315100 | -2.33144400 | 1.23182100  |
| O  | -0.68943600 | 4.13783700  | 0.53396600  |
| C  | 1.96824000  | 3.21579300  | -1.23169700 |
| H  | 2.25190100  | 2.31414600  | -1.78886600 |
| H  | 2.59963600  | 4.04993700  | -1.57848500 |
| H  | 2.17931900  | 3.04312700  | -0.16508800 |
| C  | 0.19029900  | 3.79297100  | -2.93317200 |
| H  | 0.76282800  | 4.65654900  | -3.30809200 |
| H  | 0.48241400  | 2.91235500  | -3.52511400 |
| H  | -0.88082100 | 3.98643900  | -3.09913700 |
| C  | -1.64078400 | -4.11595200 | -0.35858400 |
| H  | -1.89110400 | -5.17717300 | -0.52165000 |
| H  | -0.77971000 | -3.83721000 | -0.97908800 |
| H  | -1.35046000 | -3.97776900 | 0.69323000  |
| C  | -3.29289600 | -3.45614600 | -2.15734600 |
| H  | -2.45007500 | -3.26205800 | -2.83778500 |
| H  | -3.61710600 | -4.49796700 | -2.31035900 |
| H  | -4.12580300 | -2.78841400 | -2.42781000 |
| Bi | -1.13368600 | 0.03647100  | -1.46322100 |
| C  | 2.42501500  | -1.37993500 | 1.11782000  |
| C  | 1.18518300  | -1.44823300 | 0.50020000  |
| C  | 0.95411000  | -0.99799000 | -0.82199500 |
| C  | 2.09039800  | -0.42391700 | -1.43777500 |
| C  | 3.32439700  | -0.34405300 | -0.82209100 |

|   |             |             |             |
|---|-------------|-------------|-------------|
| F | 2.51515900  | -1.87200600 | 2.35611500  |
| F | 0.13427900  | -1.92378900 | 1.21564300  |
| F | 0.32536800  | -2.15608500 | -1.78672700 |
| F | 1.91761200  | 0.18335500  | -2.64766600 |
| F | 4.30600100  | 0.29103700  | -1.49306400 |
| C | 3.56343200  | -0.83368100 | 0.47938900  |
| O | -3.73104800 | 2.08830100  | 4.05644900  |
| C | -4.55952700 | 1.27357100  | 4.85802600  |
| H | -4.84028400 | 1.87795400  | 5.73057100  |
| H | -5.47721700 | 0.96905800  | 4.32326700  |
| H | -4.03091900 | 0.36744500  | 5.20392200  |
| C | 4.89018300  | -0.75764800 | 1.12907200  |
| C | 6.08040700  | -0.95429400 | 0.39299000  |
| C | 7.30701800  | -0.86425300 | 1.04465900  |
| H | 6.03441600  | -1.17772300 | -0.67281000 |
| C | 6.10323000  | -0.42437700 | 3.06282500  |
| C | 7.33055000  | -0.59470900 | 2.41586100  |
| H | 8.23658200  | -1.01416500 | 0.48843700  |
| H | 6.07553600  | -0.21243700 | 4.13958700  |
| H | 8.26911900  | -0.51922100 | 2.96979400  |
| N | 4.92425200  | -0.49342300 | 2.44809800  |

ts1-2d

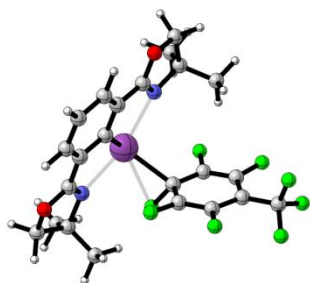

B3LYP electronic energy: -2159.7828687 a.u.  
 B3LYP enthalpy: -2159.359386 a.u.  
 B3LYP free energy: -2159.461379 a.u.  
 B3LYP SCF energy in solution: -2162.19104855 a.u.  
 B3LYP enthalpy in solution: -2161.76756655 a.u.  
 B3LYP free energy in solution: -2161.86955855 a.u.

Cartesian coordinates

| ATOM | X           | Y          | Z          |
|------|-------------|------------|------------|
| C    | -1.33902700 | 2.07444700 | 1.72089900 |
| C    | -1.80090700 | 0.93285200 | 1.05307500 |
| C    | -2.75857700 | 0.11595500 | 1.66966700 |

|    |             |             |             |
|----|-------------|-------------|-------------|
| C  | -3.23963900 | 0.42218600  | 2.95220600  |
| C  | -2.75714700 | 1.55561400  | 3.61611600  |
| C  | -1.81248200 | 2.38775900  | 3.00635600  |
| H  | -3.98396400 | -0.22423900 | 3.42228700  |
| H  | -3.12392000 | 1.79466000  | 4.61661200  |
| H  | -1.44190700 | 3.27792300  | 3.51919900  |
| C  | -3.19769900 | -1.03879900 | 0.88487300  |
| C  | -3.28881400 | -2.60464900 | -0.73420700 |
| C  | -4.44473700 | -2.78613800 | 0.29146100  |
| H  | -5.42573700 | -2.48348000 | -0.11204100 |
| H  | -4.51478600 | -3.80212600 | 0.70158800  |
| C  | -0.37485400 | 2.90044800  | 0.98888800  |
| C  | 1.05202000  | 3.63316800  | -0.59482700 |
| C  | 0.86414800  | 4.70012900  | 0.52779100  |
| H  | 1.80839900  | 5.02419600  | 0.98627700  |
| H  | 0.30283200  | 5.58579000  | 0.18785700  |
| N  | -2.73270700 | -1.29854500 | -0.29016900 |
| N  | 0.06205600  | 2.60209200  | -0.18828400 |
| O  | -4.11486700 | -1.88143000 | 1.37303700  |
| O  | 0.07408500  | 4.03582300  | 1.53884700  |
| C  | 2.46940700  | 3.04201600  | -0.56832000 |
| H  | 2.57010300  | 2.22761600  | -1.29659800 |
| H  | 3.20625000  | 3.82221800  | -0.81919800 |
| H  | 2.71412700  | 2.64628500  | 0.42948600  |
| C  | 0.71440900  | 4.18297600  | -1.98349100 |
| H  | 1.39987100  | 5.00304900  | -2.25114700 |
| H  | 0.82207300  | 3.39409300  | -2.74322000 |
| H  | -0.31709200 | 4.56622900  | -2.02011300 |
| C  | -2.22295500 | -3.70023700 | -0.57318900 |
| H  | -2.63754100 | -4.67203000 | -0.88752400 |
| H  | -1.34085400 | -3.45993600 | -1.17991800 |
| H  | -1.89761300 | -3.77778400 | 0.47487000  |
| C  | -3.78428400 | -2.52244400 | -2.17841700 |
| H  | -2.93348000 | -2.36168500 | -2.85752600 |
| H  | -4.27640600 | -3.46331200 | -2.47215100 |
| H  | -4.50268700 | -1.69818800 | -2.30954700 |
| Bi | -1.11323100 | 0.45700500  | -1.05857900 |
| C  | 2.26351400  | -1.86509500 | 1.02943000  |
| C  | 1.00396200  | -1.63665900 | 0.50304300  |
| C  | 0.79804100  | -0.96318200 | -0.72707500 |
| C  | 1.98711600  | -0.47711800 | -1.32333500 |
| C  | 3.24656400  | -0.68684300 | -0.79618400 |
| F  | 2.34059600  | -2.48888600 | 2.21085800  |
| F  | -0.07826700 | -2.00246900 | 1.23429500  |

|   |             |             |             |
|---|-------------|-------------|-------------|
| F | -0.03743400 | -1.84779000 | -1.80951800 |
| F | 1.86120600  | 0.32835600  | -2.41564600 |
| F | 4.28300100  | -0.11674800 | -1.42463500 |
| C | 3.44128800  | -1.43705700 | 0.38129000  |
| C | 4.79702500  | -1.68758800 | 0.96901200  |
| F | 4.86767300  | -2.87976600 | 1.58793900  |
| F | 5.76618900  | -1.67223000 | 0.03789900  |
| F | 5.14071000  | -0.75836500 | 1.89398900  |

ts1-2e

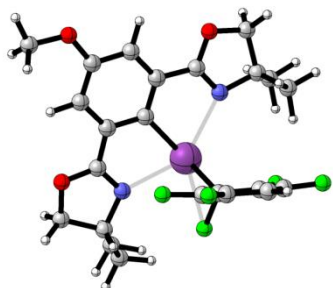

|                                |                     |
|--------------------------------|---------------------|
| B3LYP electronic energy:       | -1937.4348071 a.u.  |
| B3LYP enthalpy:                | -1936.985234 a.u.   |
| B3LYP free energy:             | -1937.083844 a.u.   |
| B3LYP SCF energy in solution:  | -1939.57076922 a.u. |
| B3LYP enthalpy in solution:    | -1939.12119622 a.u. |
| B3LYP free energy in solution: | -1939.21980622 a.u. |

Cartesian coordinates

| ATOM | X           | Y           | Z           |
|------|-------------|-------------|-------------|
| C    | -0.76746800 | 2.38192400  | 0.13168100  |
| C    | -1.16073600 | 1.06829200  | -0.17302100 |
| C    | -2.46766500 | 0.67551200  | 0.13370100  |
| C    | -3.37507700 | 1.55570300  | 0.74888700  |
| C    | -2.95960700 | 2.86006700  | 1.06058000  |
| C    | -1.65158300 | 3.27512800  | 0.74402700  |
| H    | -4.38274100 | 1.20732800  | 0.97301900  |
| H    | -1.35034300 | 4.29567400  | 0.98565600  |
| C    | -2.80966900 | -0.69771900 | -0.23602900 |
| C    | -2.60036500 | -2.83548100 | -0.91888500 |
| C    | -4.08967300 | -2.47635600 | -0.64207700 |
| H    | -4.68257100 | -2.37094000 | -1.56650000 |
| H    | -4.59252500 | -3.17824800 | 0.03642700  |
| C    | 0.60085400  | 2.74229600  | -0.24996200 |
| C    | 2.71947700  | 2.59846600  | -1.00145100 |
| C    | 2.34183400  | 4.07490800  | -0.66949600 |

|    |             |             |             |
|----|-------------|-------------|-------------|
| H  | 3.03591900  | 4.55890600  | 0.03138500  |
| H  | 2.24000100  | 4.70261400  | -1.57020600 |
| N  | -1.96722500 | -1.49747100 | -0.79699100 |
| N  | 1.41797300  | 1.91259400  | -0.80565500 |
| O  | -4.03792300 | -1.18089600 | 0.00053700  |
| O  | 1.04549300  | 3.98983600  | -0.03917800 |
| C  | 3.75388200  | 2.04850700  | -0.00778600 |
| H  | 3.93476200  | 0.97992800  | -0.18058300 |
| H  | 4.70953600  | 2.58536900  | -0.12309800 |
| H  | 3.40923700  | 2.17617000  | 1.03002600  |
| C  | 3.20364400  | 2.43009600  | -2.44429100 |
| H  | 4.12966900  | 3.00363300  | -2.61112900 |
| H  | 3.42107700  | 1.37146200  | -2.65218500 |
| H  | 2.44451100  | 2.77833300  | -3.16166800 |
| C  | -2.04209500 | -3.77424400 | 0.16254100  |
| H  | -2.51942700 | -4.76450900 | 0.07854800  |
| H  | -0.95497900 | -3.87401200 | 0.05038600  |
| H  | -2.23697800 | -3.37146400 | 1.16740700  |
| C  | -2.37948100 | -3.41191600 | -2.31818500 |
| H  | -1.30850400 | -3.61006700 | -2.47563600 |
| H  | -2.92046900 | -4.36465900 | -2.43465000 |
| H  | -2.72699200 | -2.71565000 | -3.09740000 |
| Bi | 0.23880600  | -0.36818100 | -1.22112600 |
| C  | 1.57456600  | -1.54927400 | 3.04565300  |
| C  | 0.79043100  | -1.59003100 | 1.89983100  |
| C  | 1.35441300  | -1.54748900 | 0.60195100  |
| C  | 2.76323200  | -1.42633500 | 0.56897900  |
| C  | 3.53763700  | -1.36783200 | 1.71662300  |
| F  | 0.96454500  | -1.58220700 | 4.24181400  |
| F  | -0.56059000 | -1.57791400 | 2.03053400  |
| F  | 0.87588400  | -2.78683600 | -0.34392900 |
| F  | 3.35609800  | -1.22880400 | -0.64352500 |
| F  | 4.86515100  | -1.19698400 | 1.58787400  |
| C  | 2.96782800  | -1.45725800 | 2.98842400  |
| O  | -3.74481600 | 3.78908200  | 1.65776000  |
| C  | -5.06371200 | 3.44682700  | 2.02507500  |
| H  | -5.49698300 | 4.33813400  | 2.49773200  |
| H  | -5.67672000 | 3.17338200  | 1.14731100  |
| H  | -5.08415400 | 2.61156500  | 2.74777100  |
| H  | 3.57672700  | -1.45198600 | 3.89087000  |

ts1-2f

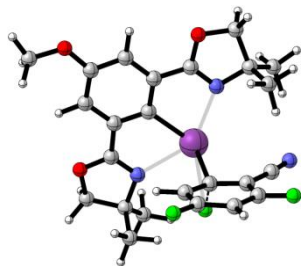

B3LYP electronic energy: -1831.3098437 a.u.  
 B3LYP enthalpy: -1830.845238 a.u.  
 B3LYP free energy: -1830.943415 a.u.  
 B3LYP SCF energy in solution: -1833.31751871 a.u.  
 B3LYP enthalpy in solution: -1832.85291371 a.u.  
 B3LYP free energy in solution: -1832.95109071 a.u.

Cartesian coordinates

| ATOM | X           | Y           | Z           |
|------|-------------|-------------|-------------|
| C    | -1.28476900 | 2.21557900  | 0.22137400  |
| C    | -1.40243700 | 0.84896000  | -0.07550500 |
| C    | -2.62438200 | 0.21783400  | 0.17224600  |
| C    | -3.71482900 | 0.91117000  | 0.72901300  |
| C    | -3.57026400 | 2.27192600  | 1.04077700  |
| C    | -2.35088300 | 2.92765500  | 0.77730400  |
| H    | -4.64965500 | 0.37981100  | 0.90371900  |
| H    | -2.26353600 | 3.98982600  | 1.01130000  |
| C    | -2.68617400 | -1.19380600 | -0.21452300 |
| C    | -2.05022500 | -3.24722500 | -0.89354100 |
| C    | -3.59671900 | -3.15781100 | -0.74358700 |
| H    | -4.11900100 | -3.12823300 | -1.71463800 |
| H    | -4.02737000 | -3.95317400 | -0.12098800 |
| C    | 0.00366100  | 2.83340300  | -0.11498300 |
| C    | 2.14443700  | 3.10463800  | -0.75832700 |
| C    | 1.45225600  | 4.47858000  | -0.51795800 |
| H    | 2.00030800  | 5.13527400  | 0.17114000  |
| H    | 1.24817100  | 5.02184900  | -1.45549000 |
| N    | -1.67187800 | -1.82222600 | -0.70437100 |
| N    | 0.99063800  | 2.17471400  | -0.61951200 |
| O    | -3.82422000 | -1.88871000 | -0.08201700 |
| O    | 0.18087900  | 4.14576200  | 0.08574600  |
| C    | 3.17438100  | 2.80657300  | 0.34218200  |
| H    | 3.57531700  | 1.79051500  | 0.23711500  |
| H    | 4.01431600  | 3.51639200  | 0.27203000  |
| H    | 2.72215500  | 2.90085600  | 1.34184500  |
| C    | 2.77382700  | 2.99782500  | -2.14907700 |
| H    | 3.56158000  | 3.75920200  | -2.26941600 |



|    |             |             |             |
|----|-------------|-------------|-------------|
| H  | 3.23666200  | 2.00879700  | -2.28750400 |
| H  | 2.01966400  | 3.15454400  | -2.93621500 |
| C  | -1.42681500 | -4.09847300 | 0.22433200  |
| H  | -1.69811500 | -5.15778000 | 0.08569700  |
| H  | -0.33477300 | -3.98909300 | 0.20959000  |
| H  | -1.79386700 | -3.77664900 | 1.21212800  |
| C  | -1.61122000 | -3.74663900 | -2.27075100 |
| H  | -0.51259200 | -3.75102600 | -2.32991500 |
| H  | -1.96552600 | -4.77611200 | -2.43936300 |
| H  | -2.00792100 | -3.10639000 | -3.07410000 |
| Bi | 0.28635300  | -0.27583900 | -1.11108300 |
| C  | 1.68265800  | -1.56276200 | 3.06693200  |
| C  | 0.90052200  | -1.50300700 | 1.93395100  |
| C  | 1.51060600  | -1.30445300 | 0.65457600  |
| C  | 2.93168100  | -1.03053700 | 0.65105000  |
| C  | 3.66156200  | -1.11670500 | 1.85118500  |
| F  | 1.08034000  | -1.77541900 | 4.25027800  |
| F  | 1.24550000  | -2.59709800 | -0.32739800 |
| F  | 4.98228300  | -0.89051900 | 1.79286000  |
| C  | 3.07790800  | -1.37943500 | 3.07663900  |
| O  | -4.54465000 | 3.03817800  | 1.58410400  |
| C  | -5.79951900 | 2.46089000  | 1.87668900  |
| H  | -6.41625400 | 3.25946800  | 2.30930900  |
| H  | -6.29597000 | 2.07739500  | 0.96729700  |
| H  | -5.71162700 | 1.63877400  | 2.60925400  |
| H  | 3.65983200  | -1.42460600 | 3.99526700  |
| C  | 3.57145700  | -0.70300800 | -0.57165300 |
| N  | 4.00958700  | -0.38377400 | -1.60533700 |
| H  | -0.17698000 | -1.63757500 | 2.03195800  |
